# Supplementary material for: N-Alkylation of amines with alcohols over nanosized zeolite beta
Source: Royal Society of Chemistry journal article supplement (doi:10.1039/c3gc41345d), 2013-01-01
Supplement: c3gc41345d.pdf [file c3gc41345d.pdf]

## Supporting Information

### **N-Alkylation of amines with alcohols over nanosized zeolite Beta**

**Marri Mahender Reddy,<sup>a</sup> Macharla Arun Kumar,<sup>a</sup> Peraka Swamy,<sup>a</sup> Mameda Naresh,<sup>a</sup> Kodumuri Srujana,<sup>a</sup> Lanka Satyanarayana,<sup>b</sup> Akula Venugopal<sup>a</sup> and Nama Narender<sup>a</sup>**

<sup>a</sup> *I&PC Division, CSIR-Indian Institute of Chemical Technology, Hyderabad 500 007, India*

Tel.: +91-40-27191703; Fax: +91-40-27160387/27160757; E-mail: narendern33@yahoo.co.in

<sup>b</sup> *Centre for NMR & Structural Chemistry, CSIR-Indian Institute of Chemical Technology, Hyderabad 500 007, India*

|                                                                                                                            |                 |
|----------------------------------------------------------------------------------------------------------------------------|-----------------|
| <b>Table of Contents.....</b>                                                                                              | <b>Page no.</b> |
| <b>General information.....</b>                                                                                            | <b>S2</b>       |
| <b>General procedure for the Coupling reaction.....</b>                                                                    | <b>S2</b>       |
| <b>Activity studies and FT-IR spectra of fresh, pyridine and 2,6-dimethylpyridine adsorbed nanosized zeolite Beta.....</b> | <b>S3-S4</b>    |
| <b><sup>1</sup>H, <sup>13</sup>C NMR and Mass Spectral data.....</b>                                                       | <b>S5-S11</b>   |
| <b>Copies of <sup>1</sup>H and <sup>13</sup>C NMR Spectra.....</b>                                                         | <b>S12-S42</b>  |
| <b>Notes and references.....</b>                                                                                           | <b>S43</b>      |

### General information

All chemicals used were reagent grade and used as received without further purification. The FT-IR spectra of the samples recorded on a Nicolet 740 FT-IR spectrometer at ambient conditions using KBr as the diluents.  $^1\text{H}$  NMR spectra were recorded by using Bruker VX NMR FT-300 or Varian Unity 500 and  $^{13}\text{C}$  NMR spectra recorded by using Bruker VX NMR FT-75 MHz spectrometers instrument in  $\text{CDCl}_3$ . The chemical shifts ( $\delta$ ) are reported in ppm units relative to TMS as an internal standard for  $^1\text{H}$  NMR and  $\text{CDCl}_3$  for  $^{13}\text{C}$  NMR spectra. Coupling constants ( $J$ ) are reported in hertz (Hz) and multiplicities are indicated as follows: s (singlet), bs (broad singlet), d (doublet), dd (doublet of doublet), t (triplet), q (quartet), m (multiplet). ESI mass spectra were recorded by using Micromass Quattro LC mass spectrometer and High-resolution mass spectra obtained by using ESI-QTOF mass spectrometry. Column chromatography was carried out using silica gel (100-200 mesh).

### General procedure

Reactions were performed in a magnetically stirred round bottomed flask fitted with a condenser and placed in a temperature controlled oil bath. Nanosized zeolite Beta (100 mg) was added to the well stirred solution of amine (2 mmol) in alcohol (6 mmol) and the reaction mixture was allowed to stir at  $135^\circ\text{C}$  in an open (air) atmosphere. After disappearance of the amine (reaction was monitored by TLC) or after the appropriate time, the reaction mixture was cooled to room temperature. The catalyst was removed by filtration, rinsed with ethyl acetate and removal of solvent in vacuo yielded a crude residue. The crude residue was further purified by column chromatography using silica gel (100-200 mesh) to afford pure products. All the products were identified on the basis of NMR and mass spectral data.

### Activity studies and FT-IR spectra of fresh, pyridine and 2,6-dimethylpyridine adsorbed nanosized zeolite Beta

In order to rationalize the role of Bronsted acid sites on the N-alkylation reaction; the surface acid sites were blocked using two different bases such as pyridine (which is a Bronsted and Lewis acid site blocker ~25.8 mmol/h) and the 2,6-dimethylpyridine (selective Bronsted acid site blocker ~ 25.8 mmol/h). These bases were adsorbed on the nanosized zeolite Beta separately. The surface poisoned samples are analyzed by FT-IR spectra and the N-alkylation reaction is performed.

In a typical experiment about 25.8 mmol/h of pyridine vapour was adsorbed on 0.2 g of catalyst at a temperature of 200 °C using N<sub>2</sub> as carrier gas with 30 mL/min. The sample was then flushed in N<sub>2</sub> flow 30 mL/min for 2 h at 200 °C. After flushing the sample temperature was brought down to 35 °C in N<sub>2</sub> flow. The pyridine adsorbed sample was subjected to N-alkylation reaction and also analyzed by FT-IR in order to distinguish the role of Bronsted and Lewis acid sites present on the nanosized zeolite Beta. A similar protocol was maintained for 2,6-dimethylpyridine (25.8 mmol/h) adsorption studies.

**Table A** N-benylation of aniline with benzyl alcohol over fresh, pyridine and 2,6-dimethylpyridine adsorbed nanosized zeolite Beta<sup>a</sup>

| Entry | Nanosized zeolite Beta        | Temperature (°C) | Time (h) | Yield <sup>b</sup> (%) |
|-------|-------------------------------|------------------|----------|------------------------|
| 1     | Fresh                         | 100              | 24       | 21                     |
| 2     | Pyridine adsorbed             | 100              | 24       | 9                      |
| 3     | 2,6-Dimethylpyridine adsorbed | 100              | 24       | 3                      |

<sup>a</sup> Reaction conditions: Benzyl alcohol (6 mmol), Aniline (2 mmol), Catalyst (100 mg), open atmosphere. <sup>b</sup> Products were characterized by NMR, Mass spectra and isolated yields calculated based on aniline.

The FT-IR spectra of fresh, pyridine and 2,6-dimethylpyridine adsorbed on nanosized zeolite Beta samples are reported in Fig. A. The pyridine adsorbed nanosized zeolite Beta showed a prominent band at 1490.4 cm<sup>-1</sup>, which is attributed to pyridine adsorbed on both Bronsted and Lewis acid sites. This observation is in good agreement with the earlier results reported by Yashima et al<sup>1</sup> in the pyridine adsorbed IR spectra of Beta zeolite. A vibrational band centred around 1636 cm<sup>-1</sup> is due to pyridine (PyH<sup>+</sup>) and/or 2,6-dimethylpyridine (2,6-DMPyH<sup>+</sup>) coordinated to Bronsted acid site appeared in both pyridine and 2,6-dimethylpyridine adsorbed spectra. Two bands at 1447 and 1621 cm<sup>-1</sup> are related to Lewis bonded pyridine is observed only in

pyridine adsorbed sample and these bands are absent in the 2,6-dimethylpyridine adsorbed spectra<sup>2</sup>. These results revealed that pyridine is adsorbed on both Lewis and Bronsted sites, whereas 2,6-dimethylpyridine is selectively adsorbed on Bronsted acid sites present on the nanosized zeolite Beta. The pyridine and 2,6-dimethylpyridine adsorbed nanosized zeolite Beta samples are evaluated for the N-alkylation reaction at a reaction temperature of 100 °C. In order to avoid the desorption of adsorbed

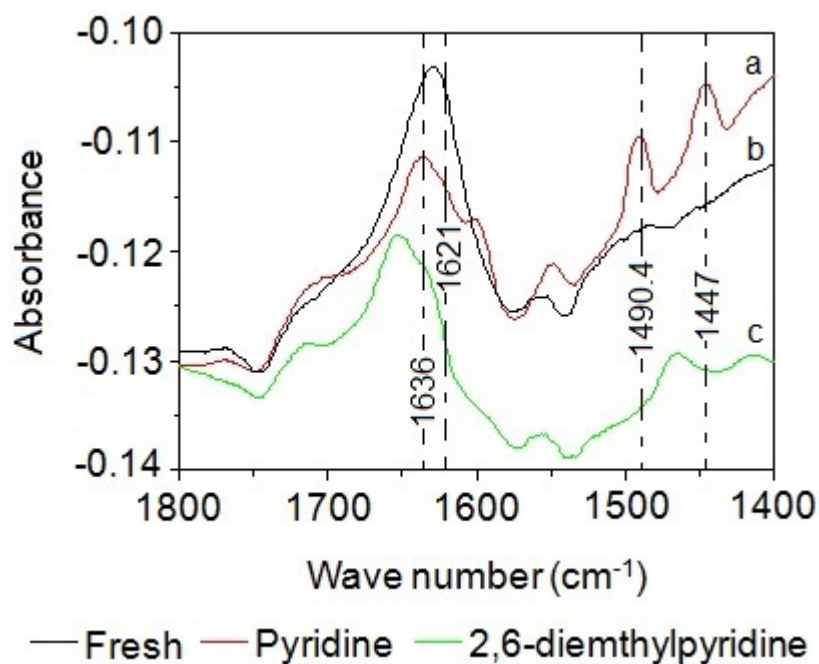

Fig. A FT-IR spectra of a) pyridine adsorbed b) fresh c) 2,6-dimethylpyridine adsorbed nanosized zeolite Beta catalysts

pyridine ( $BP_{\text{pyridine}} = 115.2 \text{ }^\circ\text{C}$ ) the fresh, pyridine and 2,6-dimethylpyridine adsorbed nanosized zeolite Beta samples are evaluated for N-alkylation of aniline with benzyl alcohol at a reaction temperature of 100 °C and the yields are compared (**Table A**). The yield of N-benzylaniline is drastically decreased after poisoning with both pyridine (9%) and 2,6-dimethylpyridine (3%). Reason for very low yield on the sample poisoned with 2,6-dimethylpyridine is because of blockage most of the Bronsted acid sites. On the other hand slightly better yields on pyridine adsorbed sample is due to partial blockage of Bronsted acid sites by pyridine as pyridine is adsorbed both on Bronsted and Lewis acid sites observed in the FT-IR analysis. From these results it can be concluded that Bronsted acid sites are required for the N-alkylation reactions.

## Spectral data

### ***N*-Benzylaniline<sup>3</sup> (Table 2, entry 1)**

<sup>1</sup>H NMR (300 MHz, CDCl<sub>3</sub>):  $\delta$  = 3.90 (bs, 1H), 4.29 (s, 2H), 6.53-6.59 (m, 2H), 6.65 (t, 1H,  $J$  = 7.55 Hz), 7.07-7.36 (m, 7H).

<sup>13</sup>C NMR (75 MHz, CDCl<sub>3</sub>):  $\delta$  = 48.1, 112.7, 117.4, 127.1, 127.4, 128.5, 129.2, 139.3, 148.0.

MS (ESI):  $m/z$  = 184 ( $M^+$  + H); HRMS calcd for C<sub>13</sub>H<sub>14</sub>N ( $M^+$  + H) 184.1126, found 184.1129.

### ***N*-Benzyl-2-methylaniline<sup>4</sup> (Table 2, entry 2)**

<sup>1</sup>H NMR (300 MHz, CDCl<sub>3</sub>):  $\delta$  = 2.15 (s, 3H), 3.75 (bs, 1H), 4.34 (s, 2H), 6.53 (d, 1H,  $J$  = 7.55 Hz), 6.60 (t, 1H,  $J$  = 6.8 Hz), 6.95-7.11 (m, 2H), 7.29-7.43 (m, 5H).

MS (ESI):  $m/z$  = 198 ( $M^+$  + H).

### ***N*-Benzyl-4-methylaniline<sup>3</sup> (Table 2, entry 3)**

<sup>1</sup>H NMR (300 MHz, CDCl<sub>3</sub>):  $\delta$  = 2.22 (s, 3H), 3.81 (bs, 1H), 4.27 (s, 2H), 6.48 (d, 2H,  $J$  = 8.31 Hz), 6.91 (d, 2H,  $J$  = 8.31 Hz), 7.17-7.37 (m, 5H).

MS (ESI):  $m/z$  = 198 ( $M^+$  + H); HRMS calcd for C<sub>14</sub>H<sub>16</sub>N ( $M^+$  + H) 198.1282, found 198.1291.

### ***N*-Benzyl-2,4-dimethylaniline<sup>5</sup> (Table 2, entry 4)**

<sup>1</sup>H NMR (500 MHz, CDCl<sub>3</sub>):  $\delta$  = 2.12 (s, 3H), 2.21 (s, 3H), 3.62 (bs, 1H), 4.31 (s, 2H), 6.45 (d, 1H,  $J$  = 8.01 Hz), 6.80-6.85 (m, 2H), 7.19-7.36 (m, 5H).

MS (ESI):  $m/z$  = 212 ( $M^+$  + H); HRMS calcd for C<sub>15</sub>H<sub>18</sub>N ( $M^+$  + H) 212.14338, found 212.14263.

### ***N*-Benzyl-2-methoxyaniline<sup>6</sup> (Table 2, entry 6)**

<sup>1</sup>H NMR (300 MHz, CDCl<sub>3</sub>):  $\delta$  = 3.84 (s, 3H), 4.35 (s, 2H), 4.60 (bs, 1H), 6.56-6.71 (m, 2H), 6.76-6.87 (m, 2H), 7.26-7.39 (m, 5H).

### ***N*-Benzyl-4-methoxyaniline<sup>7</sup> (Table 2, entry 7)**

<sup>1</sup>H NMR (300 MHz, CDCl<sub>3</sub>):  $\delta$  = 3.73 (s, 3H), 3.83 (bs, 1H), 4.28 (s, 2H), 6.60 (d, 2H,  $J$  = 9.06 Hz), 6.79 (d, 2H,  $J$  = 8.31 Hz), 7.19-7.41 (m, 5H).

<sup>13</sup>C NMR (75 MHz, CDCl<sub>3</sub>):  $\delta$  = 49.1, 55.7, 114.0, 114.8, 127.1, 127.4, 128.5, 139.6, 142.3, 152.0.

MS (ESI):  $m/z$  = 214 ( $M^+$  + H); HRMS calcd for C<sub>14</sub>H<sub>16</sub>NO ( $M^+$  + H) 214.1226, found 214.1231.

### ***N*-Benzyl-4-bromoaniline<sup>3</sup> (Table 2, entry 9)**

<sup>1</sup>H NMR (300 MHz, CDCl<sub>3</sub>): δ = 4.06 (bs, 1H), 4.29 (s, 2H), 6.49 (d, 2H, *J* = 8.88 Hz), 7.19-7.41 (m, 7H).

MS (ESI): *m/z* = 262 (M<sup>+</sup> + H).

***N*-Benzyl-4-chloroaniline<sup>3</sup> (Table 2, entry 11)**

<sup>1</sup>H NMR (300 MHz, CDCl<sub>3</sub>): δ = 3.99 (bs, 1H), 4.27 (s, 2H), 6.49 (d, 2H, *J* = 9.06 Hz), 7.06 (d, 2H, *J* = 8.31 Hz), 7.19-7.36 (m, 5H).

<sup>13</sup>C NMR (75 MHz, CDCl<sub>3</sub>): δ = 48.2, 113.8, 122.0, 127.3, 127.5, 128.6, 128.9, 138.8, 146.5.

MS (ESI): *m/z* = 218 (M<sup>+</sup> + H).

***N*-Benzyl-3,4-dichloroaniline (Table 2, entry 12)**

<sup>1</sup>H NMR (300 MHz, CDCl<sub>3</sub>): δ = 4.11 (bs, 1H), 4.28 (s, 2H), 6.33-6.49 (m, 1H), 6.59-6.74 (m, 1H), 7.09-7.39 (m, 6H).

<sup>13</sup>C NMR (75 MHz, CDCl<sub>3</sub>): δ = 48.0, 112.5, 113.8, 119.8, 127.3, 127.5, 128.4, 128.7, 128.8, 130.5, 132.7, 138.3, 147.4.

MS (ESI): *m/z* = 252 (M<sup>+</sup> + H).

**Methyl 4-(benzylamino)benzoate<sup>3</sup> (Table 2, entry 13)**

<sup>1</sup>H NMR (500 MHz, CDCl<sub>3</sub>): δ = 3.83 (s, 3H), 4.38 (s, 2H), 4.51 (bs, 1H), 6.58 (d, 2H, *J* = 8.89 Hz), 7.26-7.38 (m, 5H), 7.85 (d, 2H, *J* = 8.89 Hz).

<sup>13</sup>C NMR (75 MHz, CDCl<sub>3</sub>): δ = 47.5, 51.4, 111.6, 118.5, 127.3, 127.4, 128.7, 131.4, 138.3, 151.7, 167.2.

MS (ESI): *m/z* = 242 (M<sup>+</sup> + H); HRMS calcd for C<sub>15</sub>H<sub>16</sub>NO<sub>2</sub> (M<sup>+</sup> + H) 242.11756, found 242.11671.

**2-(Benzylamino)benzonitrile<sup>8</sup> (Table 2, entry 14)**

<sup>1</sup>H NMR (500 MHz, CDCl<sub>3</sub>): δ = 4.43 (d, 2H, *J* = 5.0 Hz), 5.01 (bs, 1H), 6.58 (d, 1H, *J* = 8.01 Hz), 6.66 (t, 1H, *J* = 8.01 Hz), 7.24-7.36 (m, 6H), 7.39 (d, 1H, *J* = 8.01 Hz).

<sup>13</sup>C NMR (75 MHz, CDCl<sub>3</sub>): δ = 47.3, 95.7, 110.9, 116.7, 117.8, 127.0, 127.5, 128.7, 132.6, 134.2, 137.6, 149.9.

**4-(Benzylamino)benzonitrile<sup>3</sup> (Table 2, entry 15)**

<sup>1</sup>H NMR (300 MHz, CDCl<sub>3</sub>): δ = 4.34 (d, 2H, *J* = 5.29 Hz), 4.63 (bs, 1H), 6.58 (d, 2H, *J* = 9.06 Hz), 7.24-7.41 (m, 7H).

MS (ESI): *m/z* = 231 (M<sup>+</sup> + Na).

***N*-Benzyl-2-nitroaniline<sup>8</sup> (Table 2, entry 16)**

$^1\text{H}$  NMR (300 MHz,  $\text{CDCl}_3$ ):  $\delta$  = 4.55 (d, 2H,  $J$  = 5.66 Hz), 6.66 (t, 1H,  $J$  = 7.36 Hz), 6.81 (d, 1H,  $J$  = 8.69 Hz), 7.15-7.45 (m, 6H), 8.19 (dd, 1H,  $J$  = 8.51, 1.13 Hz), 8.43 (bs, 1H).

MS (ESI):  $m/z$  = 229 ( $\text{M}^+$  + H).

***N*-Benzyl-3-nitroaniline<sup>5</sup> (Table 2, entry 17)**

$^1\text{H}$  NMR (300 MHz,  $\text{CDCl}_3$ ):  $\delta$  = 4.38 (s, 2H), 6.87 (dd, 1H,  $J$  = 8.99, 2.0 Hz), 7.22-7.39 (m, 6H), 7.41-7.45 (m, 1H), 7.52 (dd, 1H,  $J$  = 7.99, 2.0 Hz).

$^{13}\text{C}$  NMR (75 MHz,  $\text{CDCl}_3$ ):  $\delta$  = 47.9, 106.5, 112.0, 118.6, 127.4, 127.6, 128.8, 129.7, 138.0, 148.7, 149.3.

***N*-Benzyl-4-nitroaniline<sup>9</sup> (Table 2, entry 18)**

$^1\text{H}$  NMR (300 MHz,  $\text{CDCl}_3$ ):  $\delta$  = 4.43 (d, 2H,  $J$  = 5.48 Hz), 4.88 (bs, 1H), 6.57 (d, 2H,  $J$  = 9.25 Hz), 7.29-7.60 (m, 5H), 8.09 (d, 2H,  $J$  = 9.25 Hz).

MS (ESI):  $m/z$  = 229 ( $\text{M}^+$  + H).

***N*-Benzyl-*N*-methylaniline<sup>9</sup> (Table 2, entry 20)**

$^1\text{H}$  NMR (300 MHz,  $\text{CDCl}_3$ ):  $\delta$  = 3.01 (s, 3H), 4.53 (s, 2H), 6.71-6.78 (m, 2H), 7.15-7.35 (m, 8H).

$^{13}\text{C}$  NMR (75 MHz,  $\text{CDCl}_3$ ):  $\delta$  = 38.4, 56.6, 112.3, 116.5, 126.7, 126.8, 128.5, 129.1, 138.9, 149.7.

MS (ESI):  $m/z$  = 198 ( $\text{M}^+$  + H); HRMS calcd for  $\text{C}_{14}\text{H}_{16}\text{N}$  ( $\text{M}^+$  + H) 198.1282, found 198.1278.

***N*-Benzyl-1,2,3,4-tetrahydroquinoline<sup>3</sup> (Table 2, entry 23)**

$^1\text{H}$  NMR (500 MHz,  $\text{CDCl}_3$ ):  $\delta$  = 1.94-2.05 (m, 2H), 2.76-2.85 (m, 2H), 3.31-3.39 (m, 2H), 4.47 (s, 2H), 6.50 (d, 1H,  $J$  = 7.99 Hz), 6.56 (t, 1H,  $J$  = 6.99 Hz), 6.93-7.02 (m, 2H), 7.19-7.41 (m, 5H).

MS (ESI):  $m/z$  = 224 ( $\text{M}^+$  + H); HRMS calcd for  $\text{C}_{16}\text{H}_{18}\text{N}$  ( $\text{M}^+$  + H) 224.1439, found 224.1450.

***N*-Benzyl-1,2,3,4-tetrahydroisoquinoline<sup>3</sup> (Table 2, entry 24)**

$^1\text{H}$  NMR (500 MHz,  $\text{CDCl}_3$ ):  $\delta$  = 2.72 (t, 2H,  $J$  = 5.93 Hz), 2.87 (t, 2H,  $J$  = 5.93 Hz), 3.61 (s, 2H), 3.66 (s, 2H), 6.92 (d, 1H,  $J$  = 7.91 Hz), 7.01-7.09 (m, 3H), 7.19-7.39 (m, 5H).

$^{13}\text{C}$  NMR (75 MHz,  $\text{CDCl}_3$ ):  $\delta$  = 29.0, 50.5, 56.0, 62.7, 125.5, 125.9, 126.5, 127.0, 128.2, 128.6, 129.0, 134.3, 134.8, 138.3.

MS (ESI):  $m/z$  = 224 ( $\text{M}^+$  + H); HRMS calcd for  $\text{C}_{16}\text{H}_{18}\text{N}$  ( $\text{M}^+$  + H) 224.14338, found 224.14254.

***N*-Benzylpyrazole<sup>10</sup> (Table 2, entry 25)**

<sup>1</sup>H NMR (300 MHz, CDCl<sub>3</sub>): δ = 5.32 (s, 2H), 6.28 (t, 1H, *J* = 2.26 Hz), 7.16-7.36 (m, 5H), 7.39 (d, 1H, *J* = 2.26 Hz), 7.55 (d, 1H, *J* = 1.15 Hz).

<sup>13</sup>C NMR (75 MHz, CDCl<sub>3</sub>): δ = 55.7, 105.8, 127.4, 127.8, 128.6, 129.1, 136.5, 139.3.  
MS (ESI): *m/z* = 159 (M<sup>+</sup> + H); HRMS calcd for C<sub>10</sub>H<sub>11</sub>N<sub>2</sub> (M<sup>+</sup> + H) 159.0922, found 159.0920.

***N*-Benzyl-1,2,4-triazole<sup>10</sup> (Table 2, entry 27)**

<sup>1</sup>H NMR (300 MHz, CDCl<sub>3</sub>): δ = 5.34 (s, 2H), 7.23-7.49 (m, 5H), 7.97 (s, 1H), 8.06 (s, 1H).

MS (ESI): *m/z* = 160 (M<sup>+</sup> + H); HRMS calcd for C<sub>9</sub>H<sub>10</sub>N<sub>3</sub> (M<sup>+</sup> + H) 160.0874, found 160.0882.

***N*-(3-Methylbenzyl)aniline<sup>6</sup> (Table 3, entry 1)**

<sup>1</sup>H NMR (300 MHz, CDCl<sub>3</sub>): δ = 2.35 (s, 3H), 3.99 (bs, 1H), 4.28 (s, 2H), 6.61-6.67 (m, 2H), 6.71 (t, 1H, *J* = 7.55 Hz), 7.06-7.28 (m, 6H).

<sup>13</sup>C NMR (75 MHz, CDCl<sub>3</sub>): δ = 21.3, 48.2, 112.7, 117.4, 124.5, 127.9, 128.2, 128.4, 129.1, 138.2, 139.3, 148.2.

MS (ESI): *m/z* = 198 (M<sup>+</sup> + H); HRMS calcd for C<sub>14</sub>H<sub>16</sub>N (M<sup>+</sup> + H) 198.1282, found 198.1282.

***N*-(4-Methylbenzyl)aniline<sup>11</sup> (Table 3, entry 2)**

<sup>1</sup>H NMR (500 MHz, CDCl<sub>3</sub>): δ = 2.33 (s, 3H), 3.88 (bs, 1H), 4.24 (s, 2H), 6.53-6.69 (m, 3H), 7.07-7.23 (m, 6H).

MS (ESI): *m/z* = 198 (M<sup>+</sup> + H).

***N*-(2-Bromobenzyl)aniline<sup>11</sup> (Table 3, entry 3)**

<sup>1</sup>H NMR (500 MHz, CDCl<sub>3</sub>): δ = 4.18 (bs, 1H), 4.40 (s, 2H), 6.61 (d, 2H, *J* = 6.99 Hz), 6.71 (t, 1H, *J* = 6.99 Hz), 7.09-7.29 (m, 4H), 7.41 (d, 1H, *J* = 7.99 Hz), 7.57 (d, 1H, *J* = 7.99 Hz).

MS (ESI): *m/z* = 262 (M<sup>+</sup> + H); HRMS calcd for C<sub>13</sub>H<sub>13</sub>NBr (M<sup>+</sup> + H) 262.02259, found 262.02163.

***N*-(4-Bromobenzyl)aniline<sup>3</sup> (Table 3, entry 4)**

<sup>1</sup>H NMR (300 MHz, CDCl<sub>3</sub>): δ = 4.06 (bs, 1H), 4.29 (s, 2H), 6.59 (d, 2H, *J* = 7.74 Hz), 6.72 (t, 1H, *J* = 7.36 Hz), 7.11-7.27 (m, 4H), 7.45 (d, 2H, *J* = 8.31 Hz).

MS (ESI): *m/z* = 262 (M<sup>+</sup> + H).

***N*-(2-Chlorobenzyl)aniline<sup>11</sup> (Table 3, entry 5)**



$^1\text{H}$  NMR (300 MHz,  $\text{CDCl}_3$ ):  $\delta$  = 4.16 (bs, 1H), 4.43 (s, 2H), 6.61 (d, 2H,  $J$  = 7.55 Hz), 6.71 (t, 1H,  $J$  = 7.55 Hz), 7.13-7.46 (m, 6H).

MS (ESI):  $m/z$  = 218 ( $\text{M}^+$  + H); HRMS calcd for  $\text{C}_{13}\text{H}_{13}\text{NCl}$  ( $\text{M}^+$  + H) 218.0736, found 218.0727.

***N*-(1-Phenylethyl)aniline<sup>12</sup> (Table 3, entry 7)**

$^1\text{H}$  NMR (500 MHz,  $\text{CDCl}_3$ ):  $\delta$  = 1.51 (d, 3H,  $J$  = 6.01 Hz), 3.98 (bs, 1H), 4.45 (q, 1H,  $J$  = 6.06 Hz), 6.43 (d, 2H,  $J$  = 8.01 Hz), 6.58 (t, 1H,  $J$  = 8.01 Hz), 7.07-7.14 (m, 2H), 7.24-7.34 (m, 5H).

MS (ESI):  $m/z$  = 198 ( $\text{M}^+$  + H).

***N*-(1-(4-Bromophenyl)ethyl)aniline<sup>13</sup> (Table 3, entry 8)**

$^1\text{H}$  NMR (300 MHz,  $\text{CDCl}_3$ ):  $\delta$  = 1.47 (d, 3H,  $J$  = 6.81 Hz), 3.98 (bs, 1H), 4.43 (q, 1H,  $J$  = 6.81 Hz), 6.47 (d, 2H,  $J$  = 8.31 Hz), 6.65 (t, 1H,  $J$  = 8.31 Hz), 7.04-7.13 (m, 2H), 7.21-7.29 (m, 2H), 7.41-7.47 (m, 2H).

MS (ESI):  $m/z$  = 276 ( $\text{M}^+$  + H).

***N*-(1-Propyl)aniline<sup>14</sup> (Table 3, entry 9)**

$^1\text{H}$  NMR (300 MHz,  $\text{CDCl}_3$ ):  $\delta$  = 0.95 (t, 3H,  $J$  = 7.55 Hz), 1.75-1.89 (m, 2H), 4.05 (bs, 1H), 4.22 (t, 1H,  $J$  = 6.81 Hz), 6.51 (d, 2H,  $J$  = 7.55 Hz), 6.58-6.67 (m, 1H), 7.02-7.11 (m, 2H), 7.17-7.37 (m, 5H).

MS (ESI):  $m/z$  = 212 ( $\text{M}^+$  + H).

***N*-(1-(2-Naphthyl)ethyl)aniline<sup>12</sup> (Table 3, entry 10)**

$^1\text{H}$  NMR (300 MHz,  $\text{CDCl}_3$ ):  $\delta$  = 1.58 (d, 3H,  $J$  = 6.79 Hz), 4.10 (bs, 1H), 4.63 (q, 1H,  $J$  = 6.79 Hz), 6.55 (d, 2H,  $J$  = 8.31 Hz), 6.63 (t, 1H,  $J$  = 8.31 Hz), 7.07 (t, 2H,  $J$  = 8.31 Hz), 7.39-7.54 (m, 3H), 7.75-7.89 (m, 4H).

MS (ESI):  $m/z$  = 248 ( $\text{M}^+$  + H); HRMS calcd for  $\text{C}_{18}\text{H}_{18}\text{N}$  ( $\text{M}^+$  + H) 248.1433, found 248.1435.

***N*-(Furan-2-ylmethyl)aniline<sup>15</sup> (Table 3, entry 11)**

$^1\text{H}$  NMR (300 MHz,  $\text{CDCl}_3$ ):  $\delta$  = 4.31 (s, 2H), 6.23 (d, 1H,  $J$  = 3.02 Hz), 6.29-6.32 (m, 1H), 6.67 (d, 2H,  $J$  = 8.49 Hz), 6.73 (t, 1H,  $J$  = 7.36 Hz), 7.14-7.23 (m, 2H), 7.34-7.39 (m, 1H).

MS (ESI):  $m/z$  = 174 ( $\text{M}^+$  + H); HRMS calcd for  $\text{C}_{11}\text{H}_{12}\text{NO}$  ( $\text{M}^+$  + H) 174.0918, found 174.0911.

***N*-(Cyclohex-2-enyl)aniline<sup>6</sup> (Table 3, entry 14)**

$^1\text{H}$  NMR (300 MHz,  $\text{CDCl}_3$ ):  $\delta$  = 1.53-1.81 (m, 3H), 1.87-2.14 (m, 3H), 3.59 (bs, 1H), 3.94-4.06 (m, 1H), 5.71-5.92 (m, 2H), 6.57-6.79 (m, 3H), 7.11-7.24 (m, 2H).

MS (ESI):  $m/z = 174 (M^+ + H)$ .

**(*E*)-*N*-(2-Hexenyl)aniline<sup>16</sup> (Table 3, entry 15)**

<sup>1</sup>H NMR (300 MHz, CDCl<sub>3</sub>):  $\delta = 0.89$  (t, 3H,  $J = 7.36$  Hz), 1.33-1.47 (m, 2H), 2.02 (q, 2H,  $J = 6.99$  Hz), 3.69 (d, 2H,  $J = 5.66$  Hz), 3.79 (bs, 1H), 5.51-5.79 (m, 2H), 6.62 (d, 2H,  $J = 8.31$  Hz), 6.66-6.74 (m, 1H), 7.12-7.24 (m, 2H).

MS (ESI):  $m/z = 176 (M^+ + H)$ .

***N*-Hexylaniline<sup>17</sup> (Table 3, entry 16)**

<sup>1</sup>H NMR (300 MHz, CDCl<sub>3</sub>):  $\delta = 0.89$  (t, 3H,  $J = 6.81$  Hz), 1.29-1.39 (m, 6H), 1.54-1.63 (m, 2H), 3.10 (t, 2H,  $J = 6.81$  Hz), 3.64 (bs, 1H), 6.61 (d, 2H,  $J = 7.55$  Hz), 6.68 (t, 1H,  $J = 7.55$  Hz), 7.13-7.22 (m, 2H).

MS (ESI):  $m/z = 178 (M^+ + H)$ ; HRMS calcd for C<sub>12</sub>H<sub>20</sub>N ( $M^+ + H$ ) 178.1595, found 178.1603.

***N*-Octylaniline<sup>3</sup> (Table 3, entry 17)**

<sup>1</sup>H NMR (300 MHz, CDCl<sub>3</sub>):  $\delta = 0.88$  (t, 3H,  $J = 6.79$  Hz), 1.23-1.36 (m, 10H), 1.55-1.67 (m, 2H), 3.09 (t, 2H,  $J = 7.55$  Hz), 3.62 (bs, 1H), 6.59 (d, 2H,  $J = 7.55$  Hz), 6.68 (t, 1H,  $J = 7.55$  Hz), 7.13-7.22 (m, 2H).

***N*-(2-Nitrobenzylidene)aniline<sup>18</sup> (Table 4, entry 1)**

<sup>1</sup>H NMR (300 MHz, CDCl<sub>3</sub>):  $\delta = 7.24$ -7.34 (m, 3H), 7.39-7.47 (m, 2H), 7.59-7.79 (m, 2H), 8.04-8.11 (m, 1H), 8.29-8.34 (m, 1H), 8.95 (s, 1H).

MS (ESI):  $m/z = 227 (M^+ + H)$ .

***N*-(3-Nitrobenzylidene)aniline<sup>19</sup> (Table 4, entry 2)**

<sup>1</sup>H NMR (300 MHz, CDCl<sub>3</sub>):  $\delta = 7.22$ -7.36 (m, 3H), 7.39-7.51 (m, 2H), 7.67 (t, 1H,  $J = 7.55$  Hz), 8.26 (d, 1H,  $J = 7.55$  Hz), 8.31-8.41 (m, 1H), 8.55 (s, 1H), 8.75 (s, 1H).

MS (ESI):  $m/z = 227 (M^+ + H)$ .

***N*-(4-Nitrobenzylidene)aniline<sup>18</sup> (Table 4, entry 3)**

<sup>1</sup>H NMR (300 MHz, CDCl<sub>3</sub>):  $\delta = 7.22$ -7.34 (m, 3H), 7.44 (t, 2H,  $J = 7.74$  Hz), 8.08 (d, 2H,  $J = 8.69$  Hz), 8.34 (d, 2H,  $J = 8.69$  Hz), 8.56 (s, 1H).

<sup>13</sup>C NMR (75 MHz, CDCl<sub>3</sub>):  $\delta = 120.8, 123.8, 126.9, 129.2, 129.2, 141.4, 149.0, 150.7, 157.2$ .

MS (ESI):  $m/z = 227 (M^+ + H)$ .

***N*-(4-Nitrobenzylidene)-2-methylaniline (Table 4, entry 4)**

<sup>1</sup>H NMR (300 MHz, CDCl<sub>3</sub>):  $\delta = 2.39$  (s, 3H), 6.94-7.01 (m, 1H), 7.15-7.29 (m, 3H), 8.09 (d, 2H,  $J = 9.06$  Hz), 8.33 (d, 2H,  $J = 8.31$  Hz), 8.47 (s, 1H).

***N*-(4-Nitrobenzylidene)-4-methylaniline<sup>20</sup> (Table 4, entry 5)**

$^1\text{H}$  NMR (300 MHz,  $\text{CDCl}_3$ ):  $\delta$  = 2.39 (s, 3H), 7.17-7.42 (m, 4H), 8.07 (d, 2H,  $J$  = 9.06 Hz), 8.32 (d, 2H,  $J$  = 9.06 Hz), 8.57 (s, 1H).

$^{13}\text{C}$  NMR (75 MHz,  $\text{CDCl}_3$ ):  $\delta$  = 21.0, 120.9, 123.9, 129.2, 129.9, 137.2, 141.7, 148.2, 149.1, 156.2.

MS (ESI):  $m/z$  = 241 ( $\text{M}^+$  + H).

***N*-(4-Nitrobenzylidene)-2-methoxyaniline (Table 4, entry 6)**

$^1\text{H}$  NMR (300 MHz,  $\text{CDCl}_3$ ):  $\delta$  = 3.90 (s, 3H), 6.96-7.09 (m, 3H), 7.22-7.29 (m, 1H), 8.09 (d, 2H,  $J$  = 9.06 Hz), 8.32 (d, 2H,  $J$  = 8.31 Hz), 8.61 (s, 1H).

$^{13}\text{C}$  NMR (75 MHz,  $\text{CDCl}_3$ ):  $\delta$  = 55.8, 111.6, 120.5, 120.9, 123.8, 127.7, 129.3, 140.3, 141.6, 149.0, 152.3, 158.3.

MS (ESI):  $m/z$  = 257 ( $\text{M}^+$  + H).

***N*-(4-Nitrobenzylidene)-4-methoxyaniline<sup>20</sup> (Table 4, entry 7)**

$^1\text{H}$  NMR (300 MHz,  $\text{CDCl}_3$ ):  $\delta$  = 3.85 (s, 3H), 6.96 (d, 2H,  $J$  = 8.87 Hz), 7.32 (d, 2H,  $J$  = 8.87 Hz), 8.06 (d, 2H,  $J$  = 8.69 Hz), 8.32 (d, 2H,  $J$  = 8.87 Hz), 8.58 (s, 1H).

$^{13}\text{C}$  NMR (75 MHz,  $\text{CDCl}_3$ ):  $\delta$  = 55.5, 114.5, 122.6, 123.9, 129.0, 141.9, 143.5, 148.9, 154.7, 159.2.

MS (ESI):  $m/z$  = 257 ( $\text{M}^+$  + H).

***N*-(4-Nitrobenzylidene)-4-chloroaniline<sup>20</sup> (Table 4, entry 9)**

$^1\text{H}$  NMR (300 MHz,  $\text{CDCl}_3$ ):  $\delta$  = 7.21 (d, 2H,  $J$  = 9.06 Hz), 7.40 (d, 2H,  $J$  = 8.31 Hz), 8.08 (d, 2H,  $J$  = 9.06 Hz), 8.34 (d, 2H,  $J$  = 8.31 Hz), 8.54 (s, 1H).

$^{13}\text{C}$  NMR (75 MHz,  $\text{CDCl}_3$ ):  $\delta$  = 122.3, 123.9, 129.4, 130.4, 132.7, 141.2, 149.2, 149.3, 157.6.

***N*-(4-Nitrobenzyl)aniline<sup>3</sup>**

$^1\text{H}$  NMR (500 MHz,  $\text{CDCl}_3$ ):  $\delta$  = 4.24 (bs, 1H), 4.47 (s, 2H), 6.56-6.61 (m, 2H), 6.72-6.79 (m, 1H), 7.14-7.21 (m, 2H), 7.53 (d, 2H,  $J$  = 8.54 Hz), 8.19 (d, 2H,  $J$  = 8.54 Hz).

$^{13}\text{C}$  NMR (75 MHz,  $\text{CDCl}_3$ ):  $\delta$  = 47.5, 112.8, 118.1, 123.8, 127.6, 129.3, 147.0, 147.2, 147.5.

**Dibenzyl ether<sup>21</sup>**

$^1\text{H}$  NMR (500 MHz,  $\text{CDCl}_3$ ):  $\delta$  = 4.52 (s, 4H), 7.19-7.37 (m, 10H).

**Bis(4-nitrobenzyl) ether<sup>22</sup>**

$^1\text{H}$  NMR (500 MHz,  $\text{CDCl}_3$ ):  $\delta$  = 4.72 (s, 4H), 7.54 (d, 4H,  $J$  = 8.85 Hz), 8.23 (d, 4H,  $J$  = 8.85 Hz).

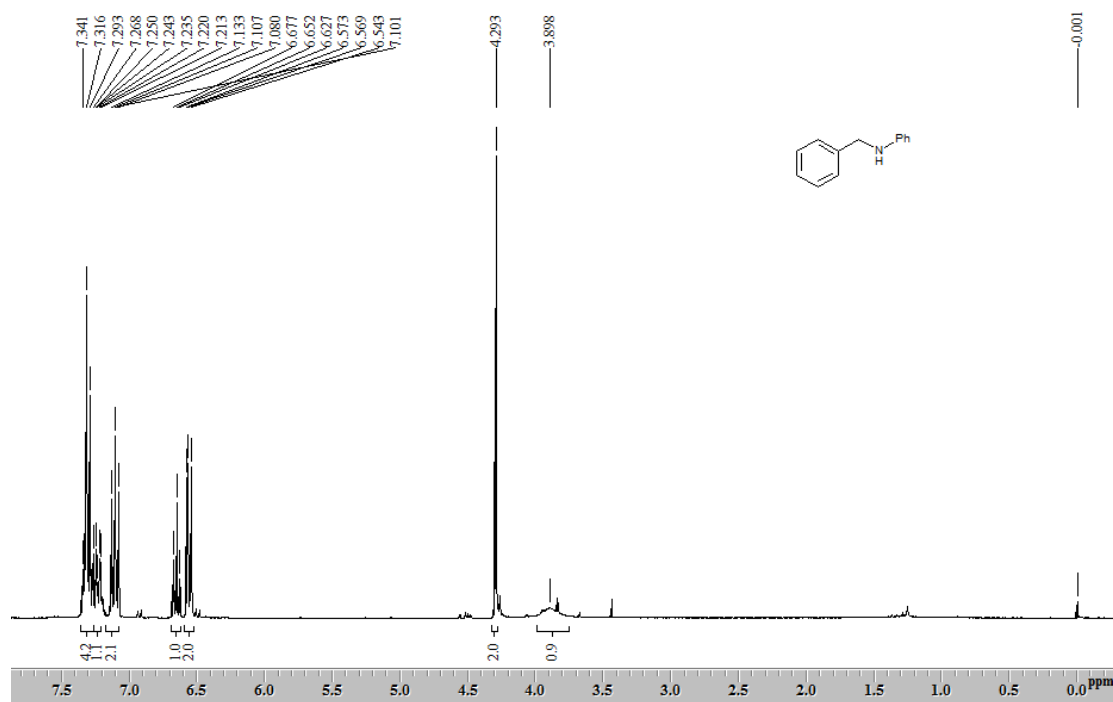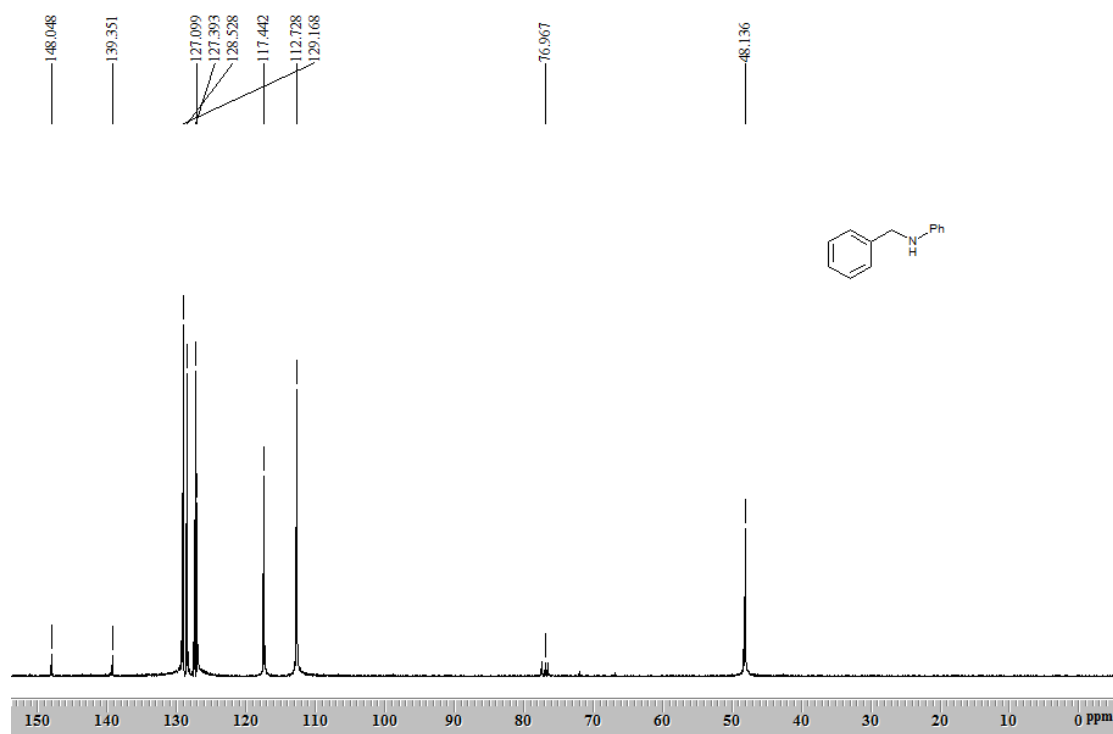

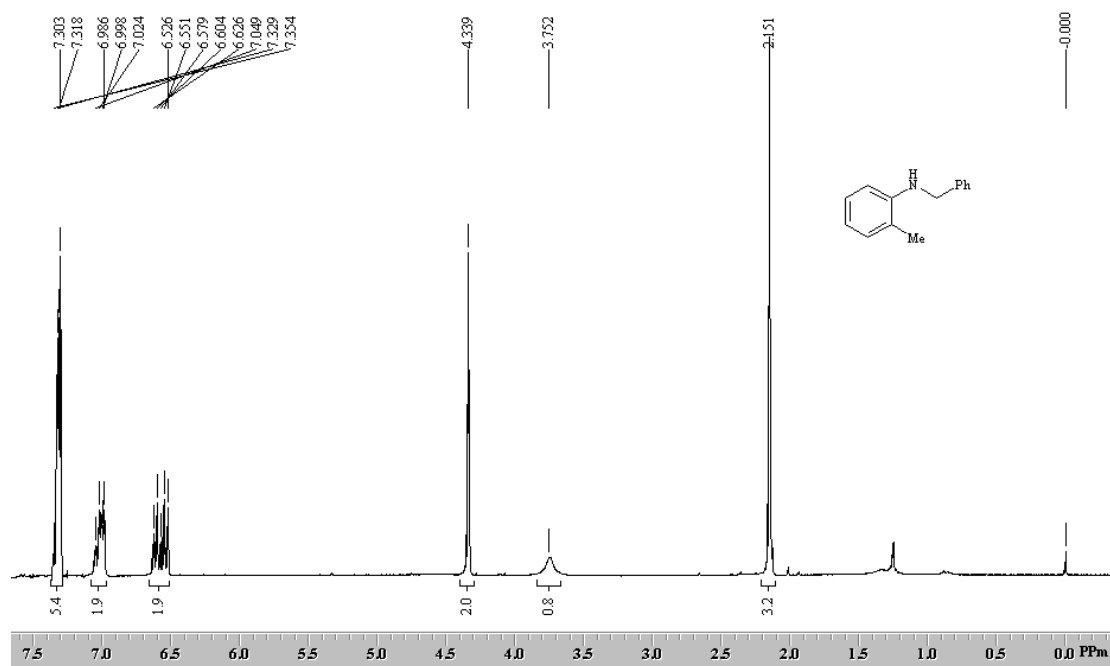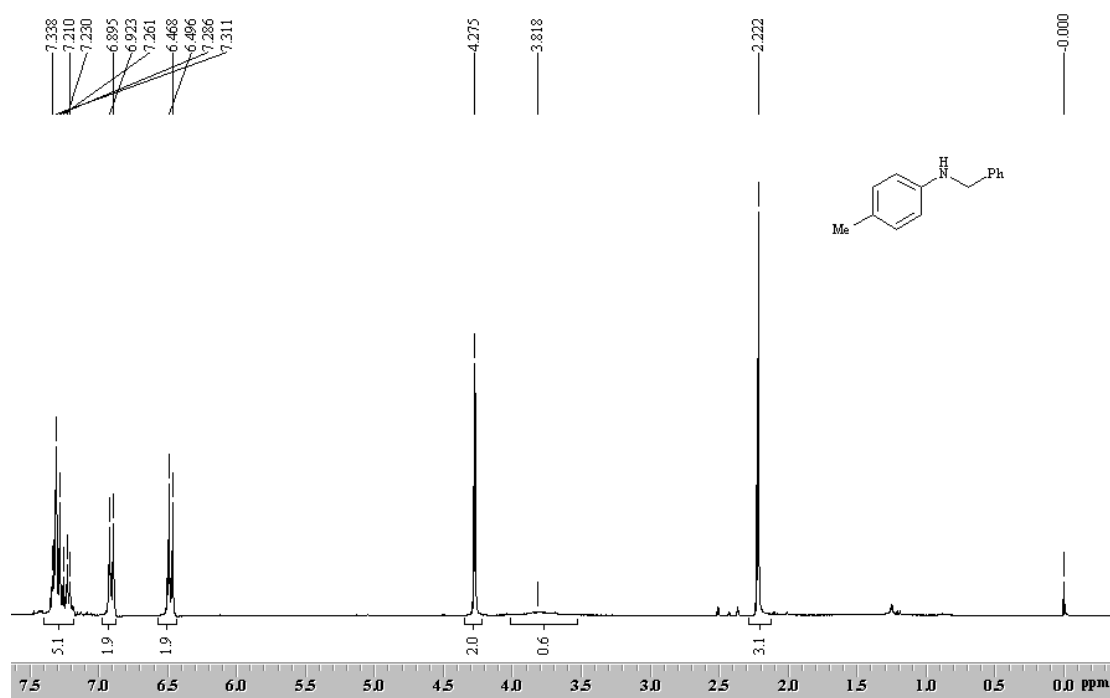

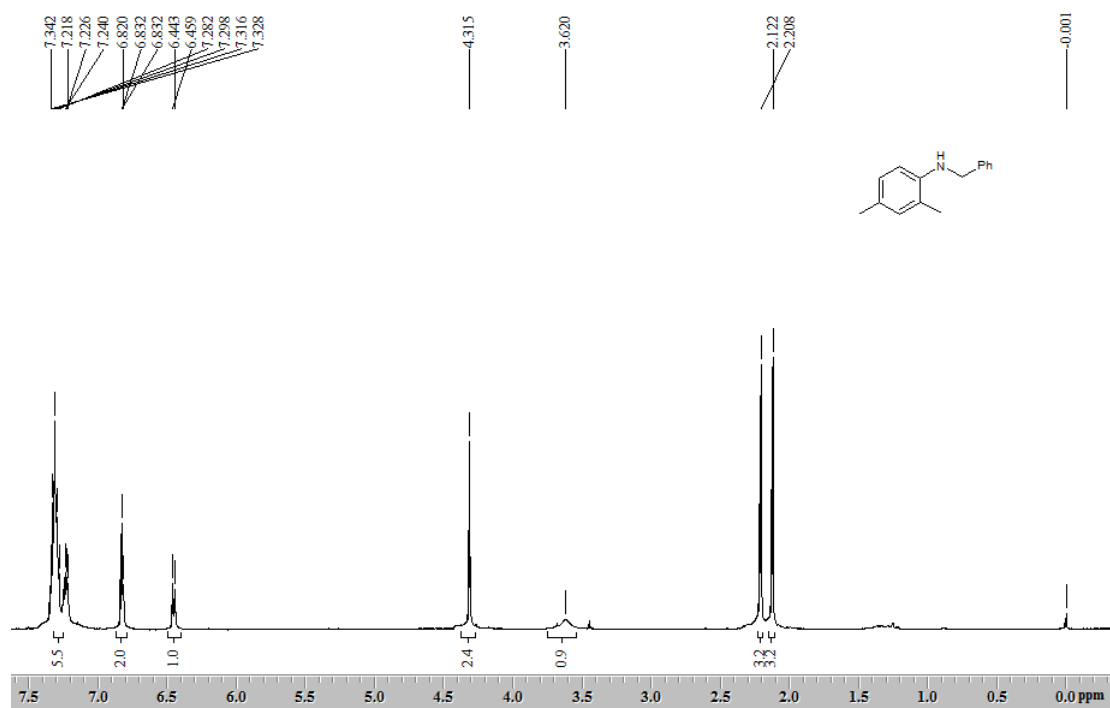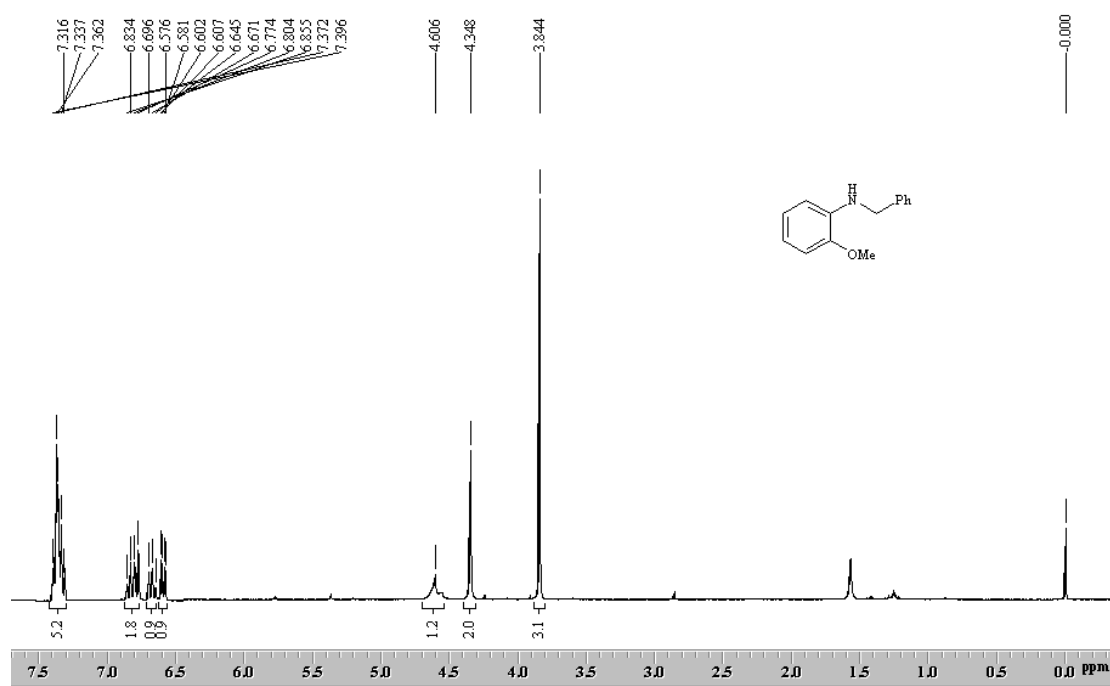

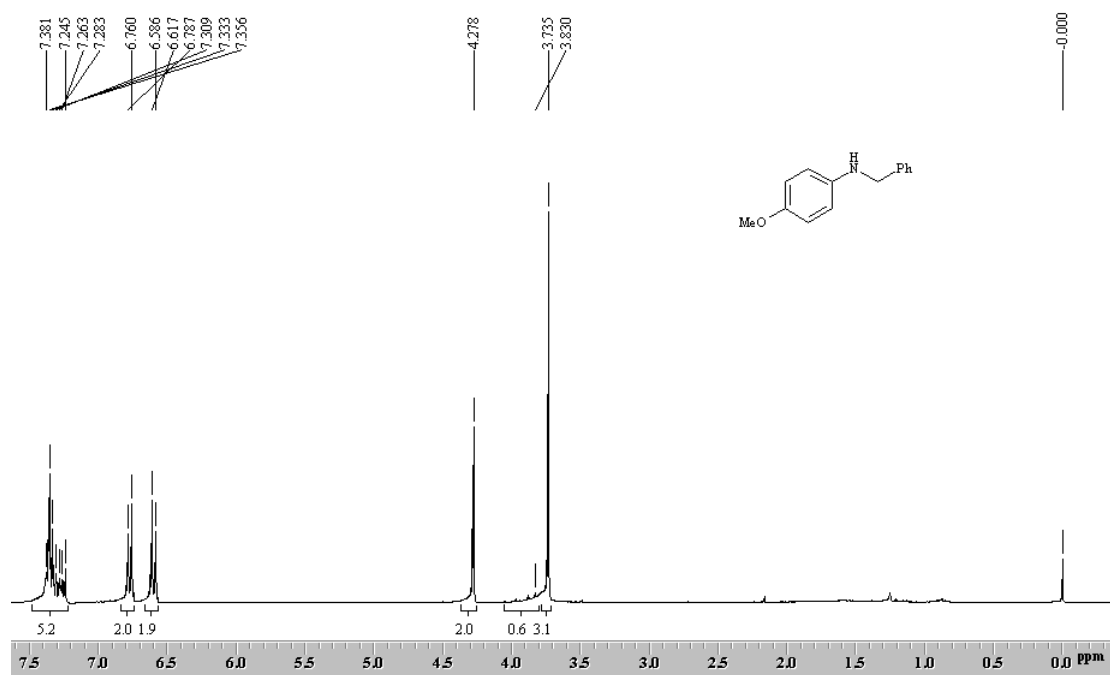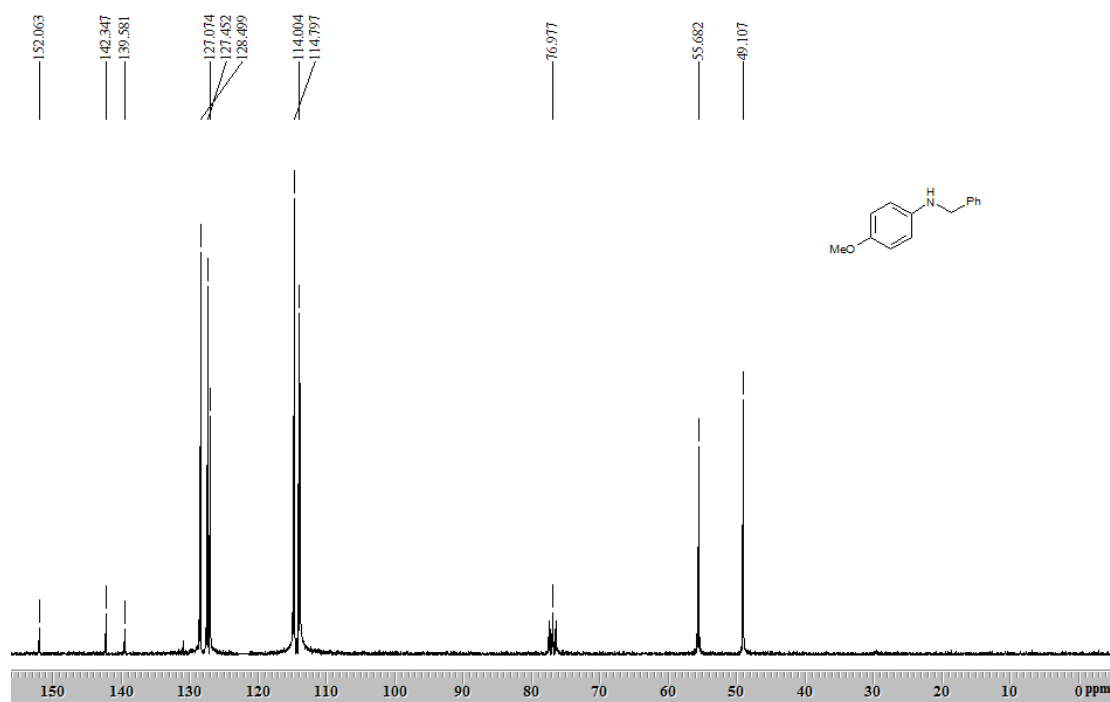

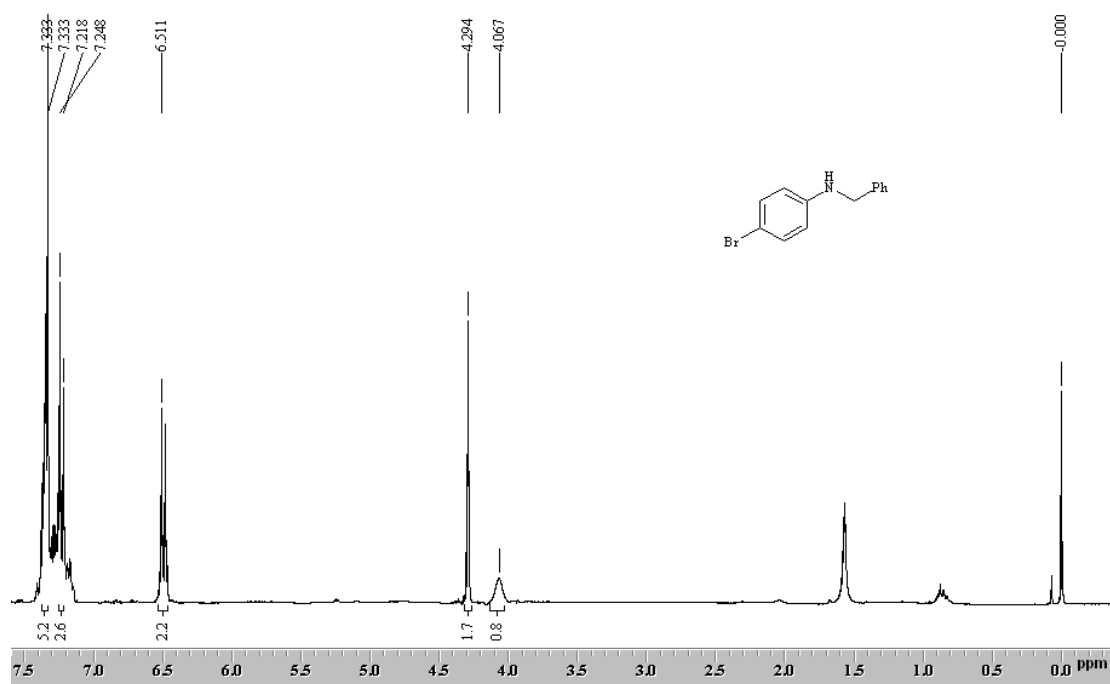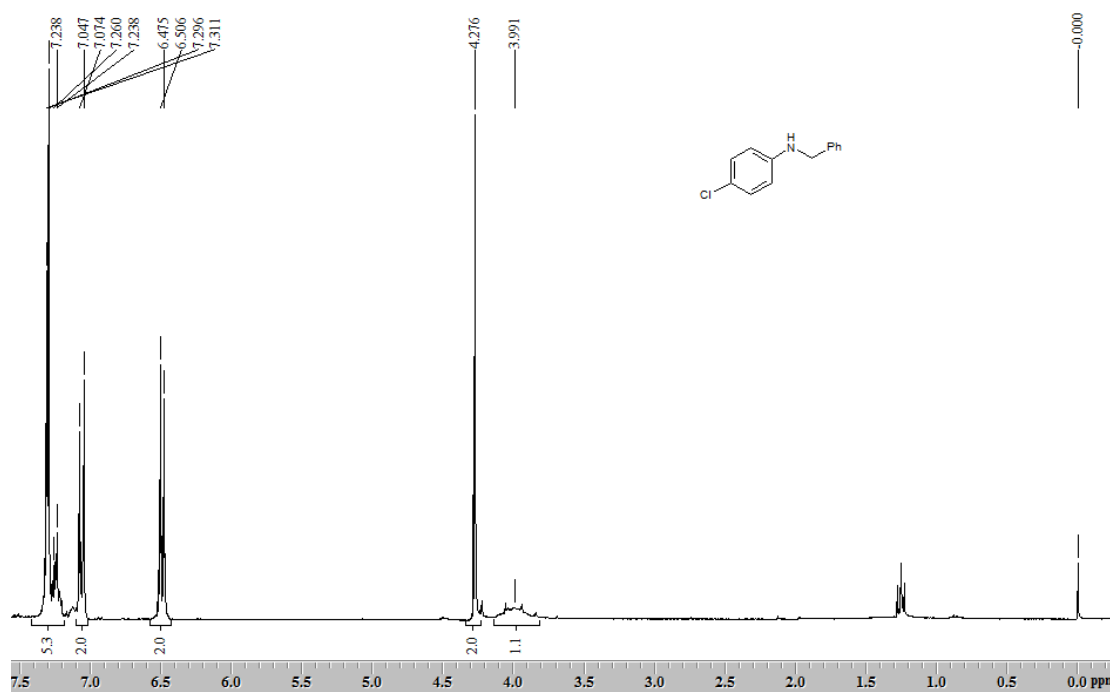



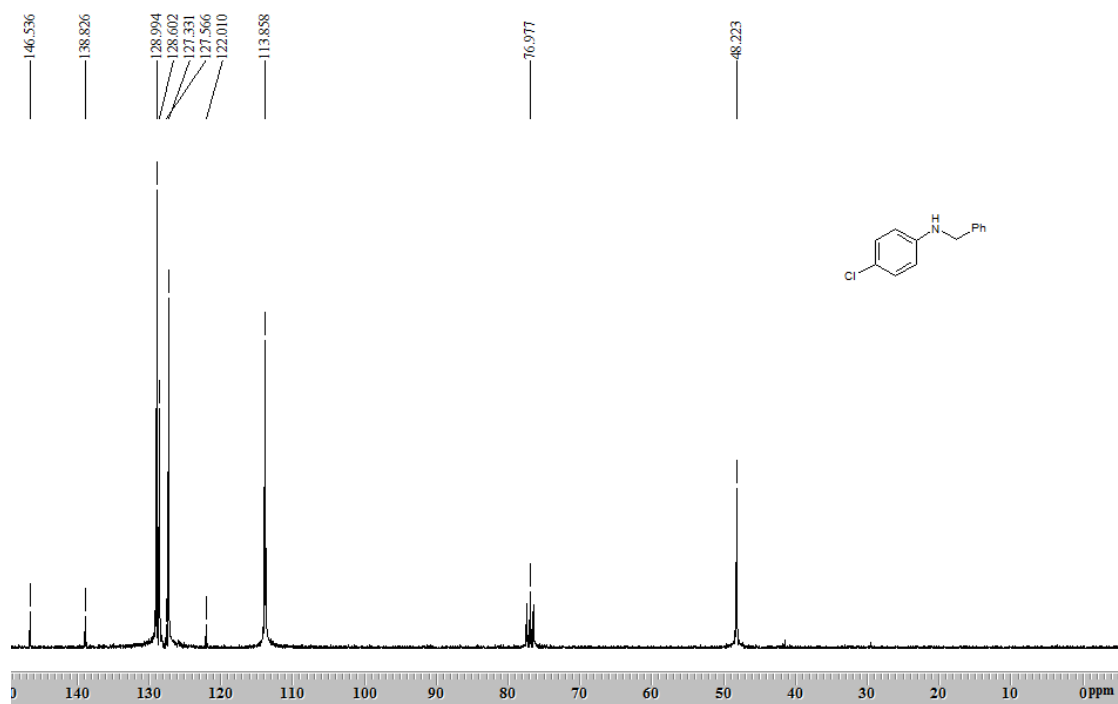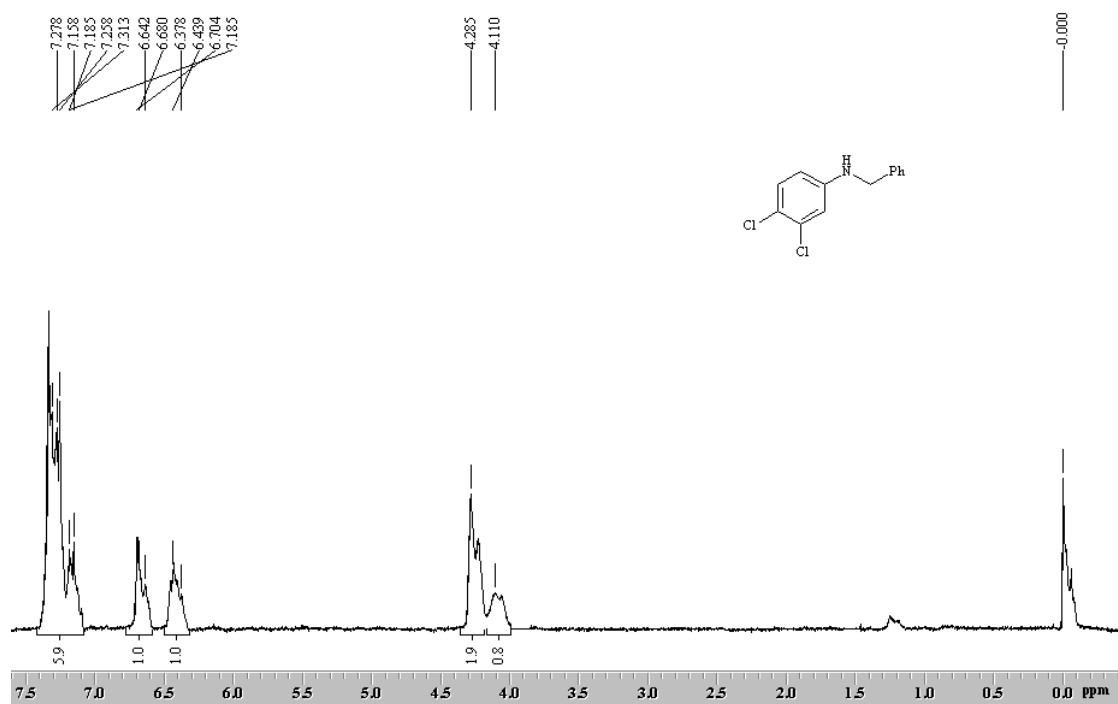

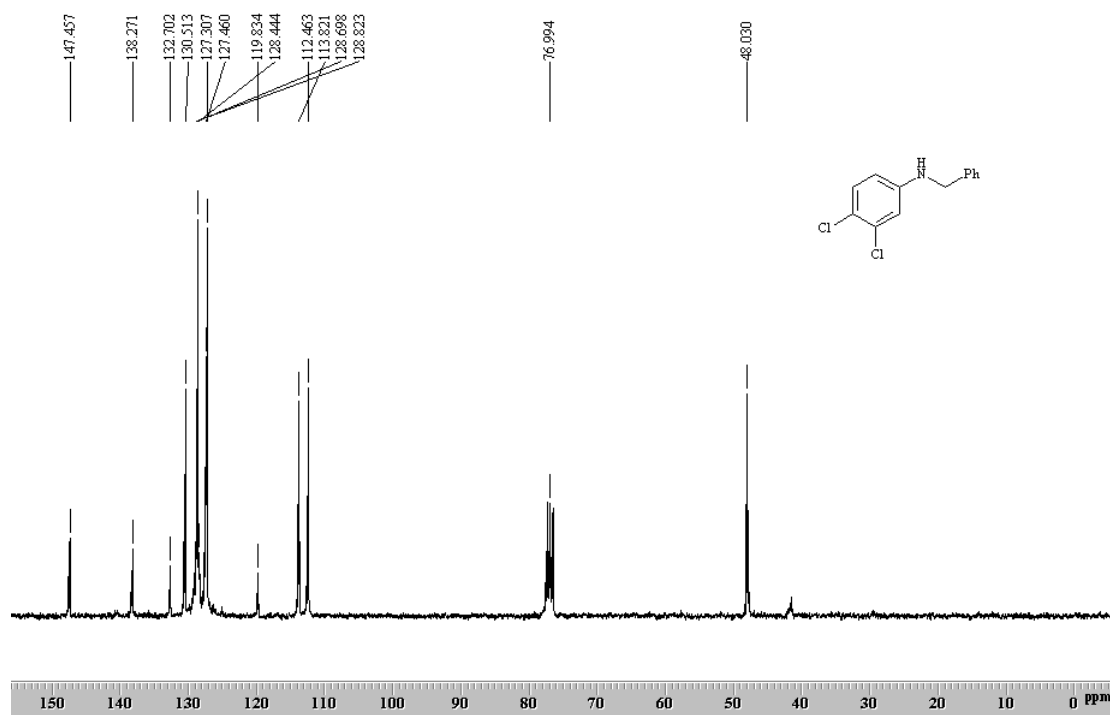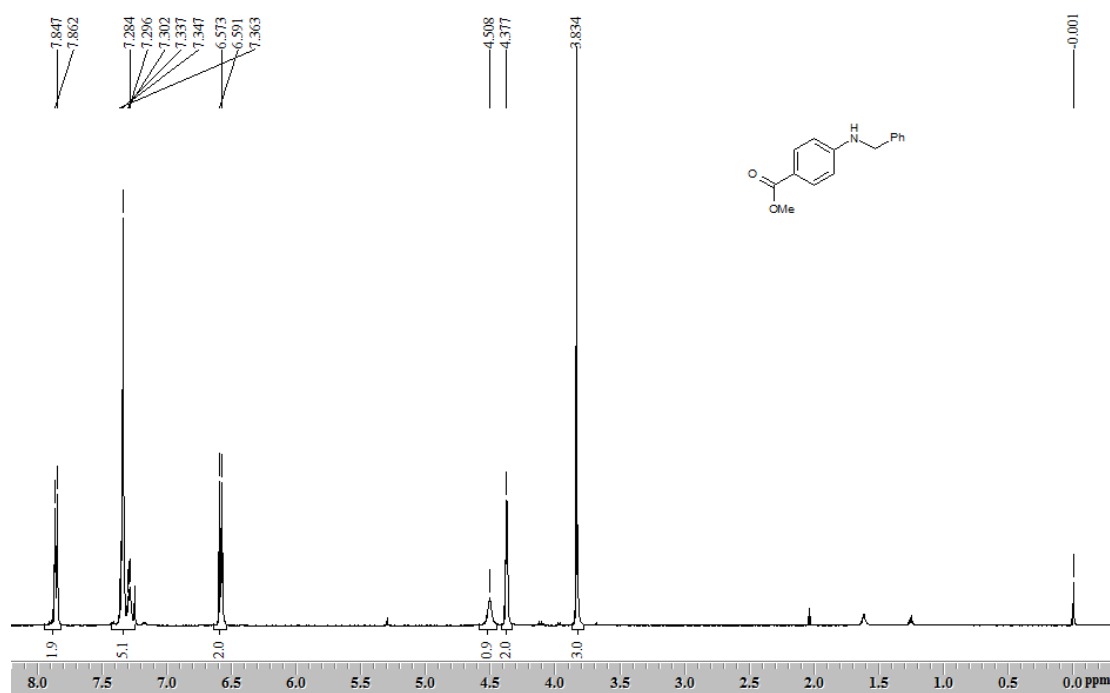

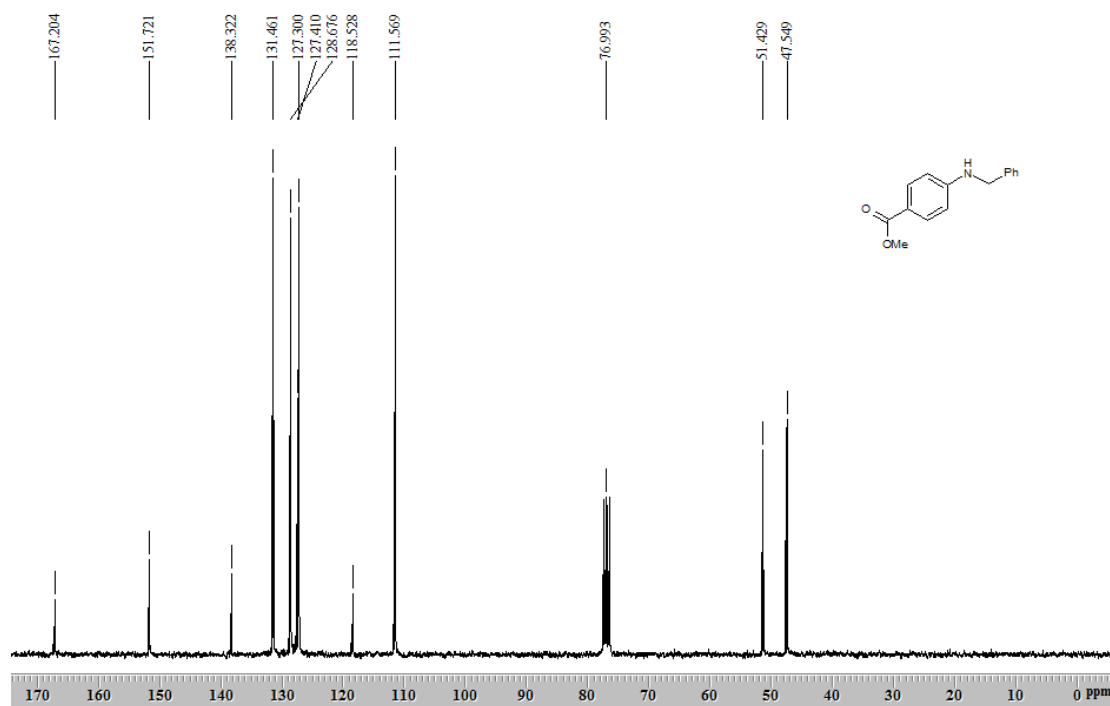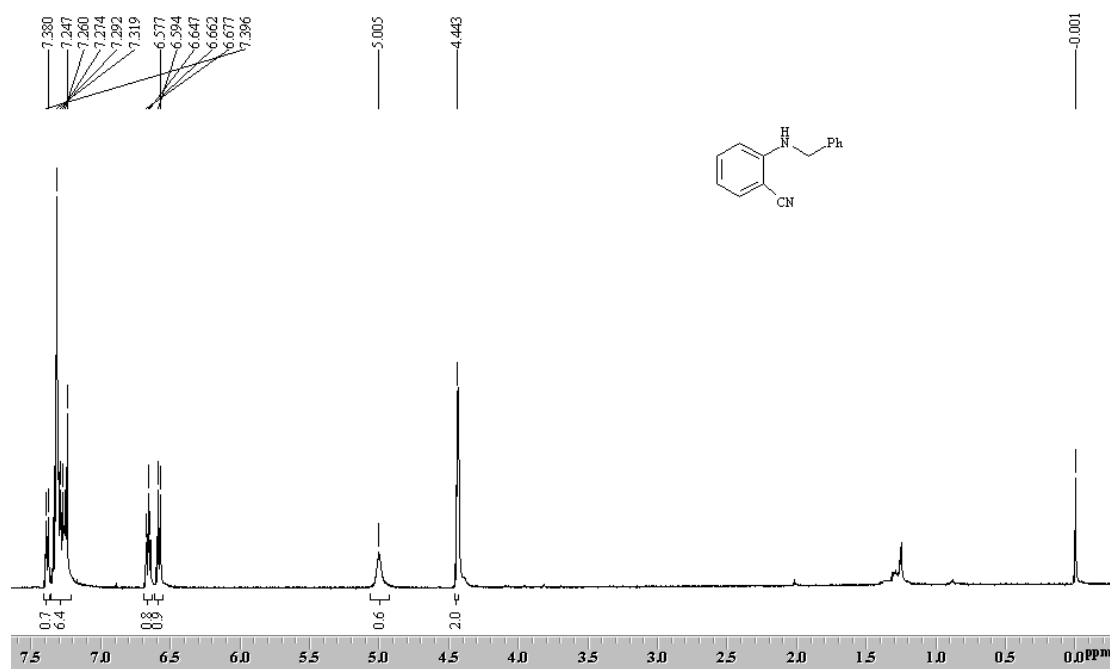

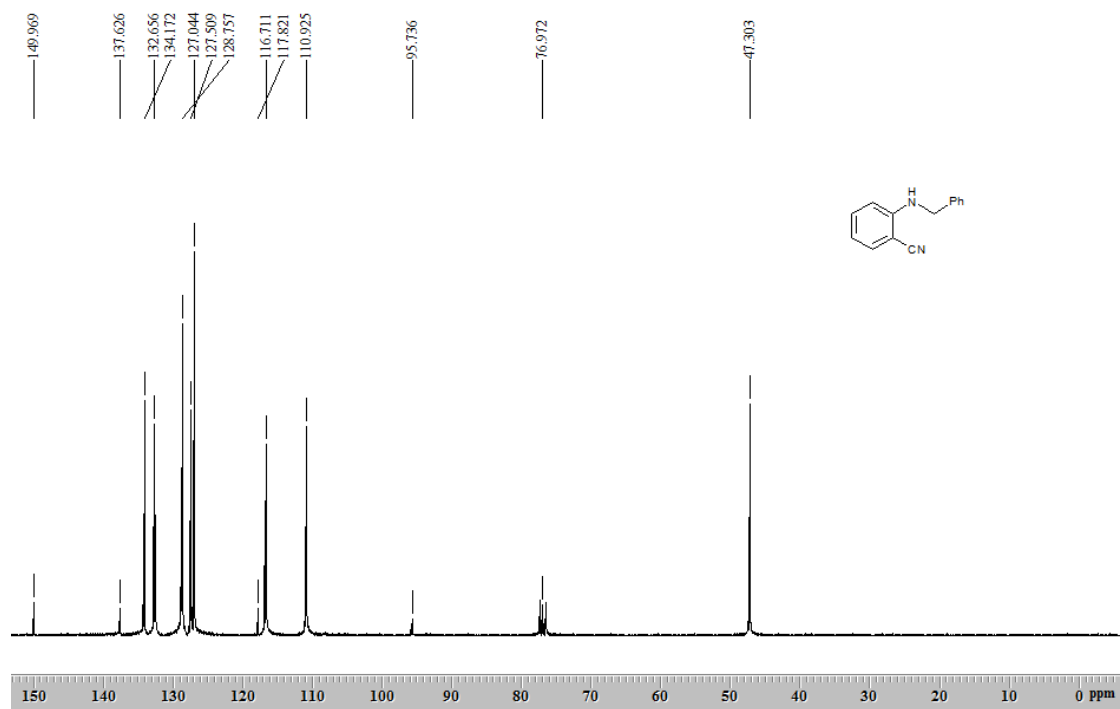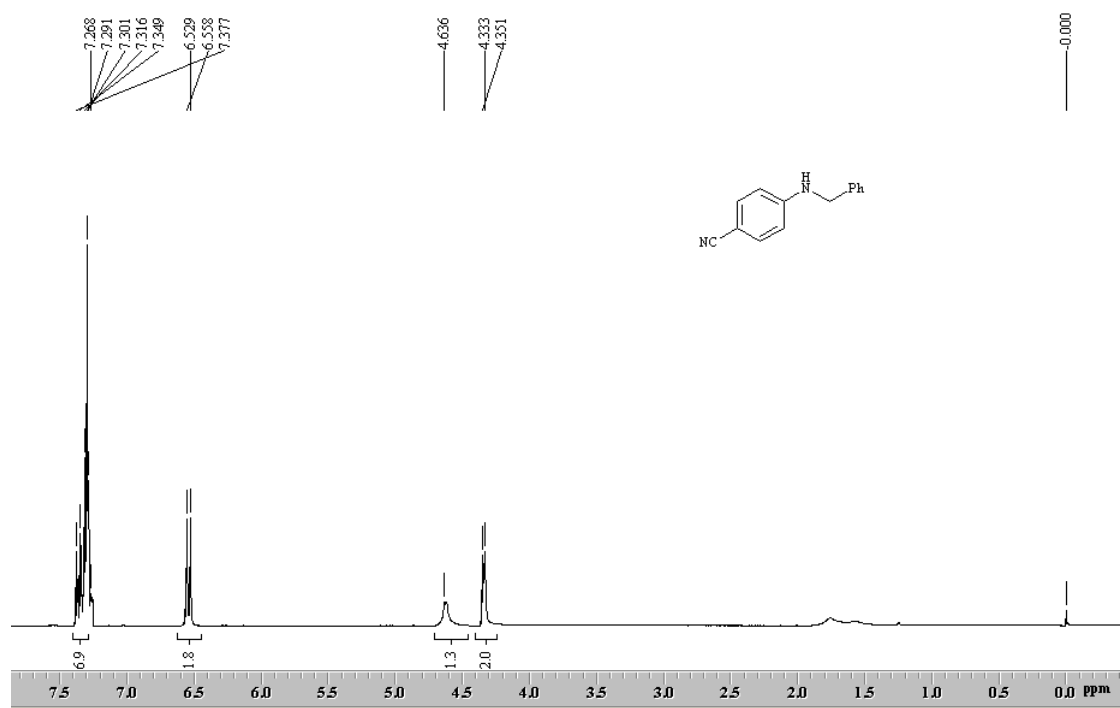

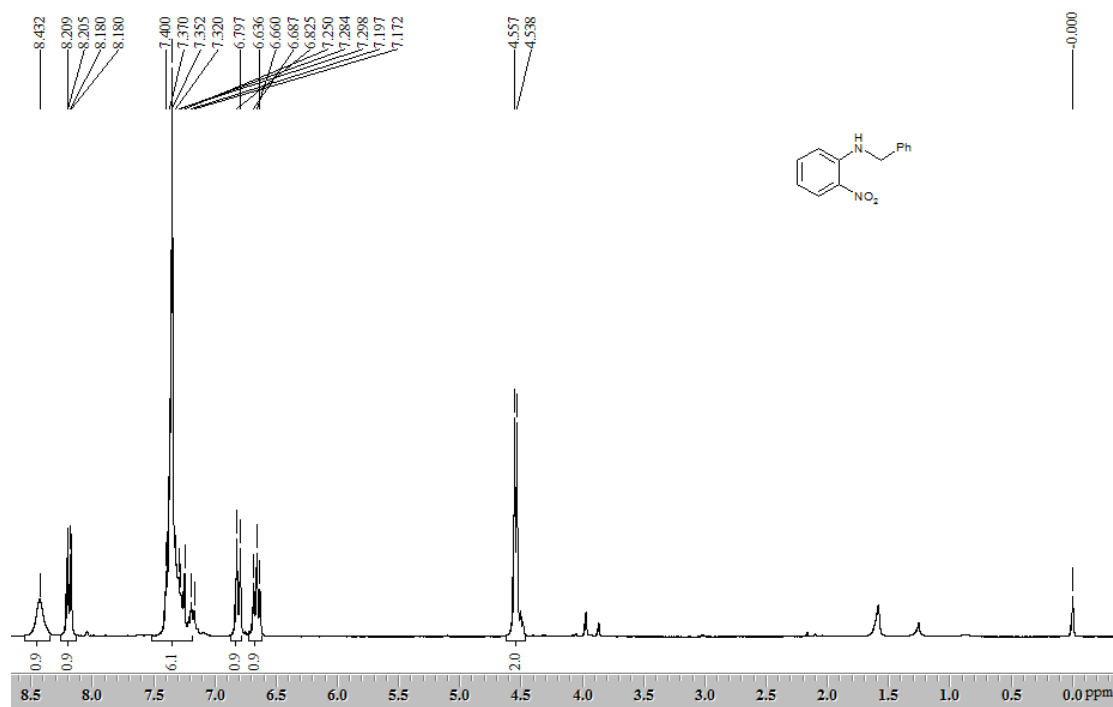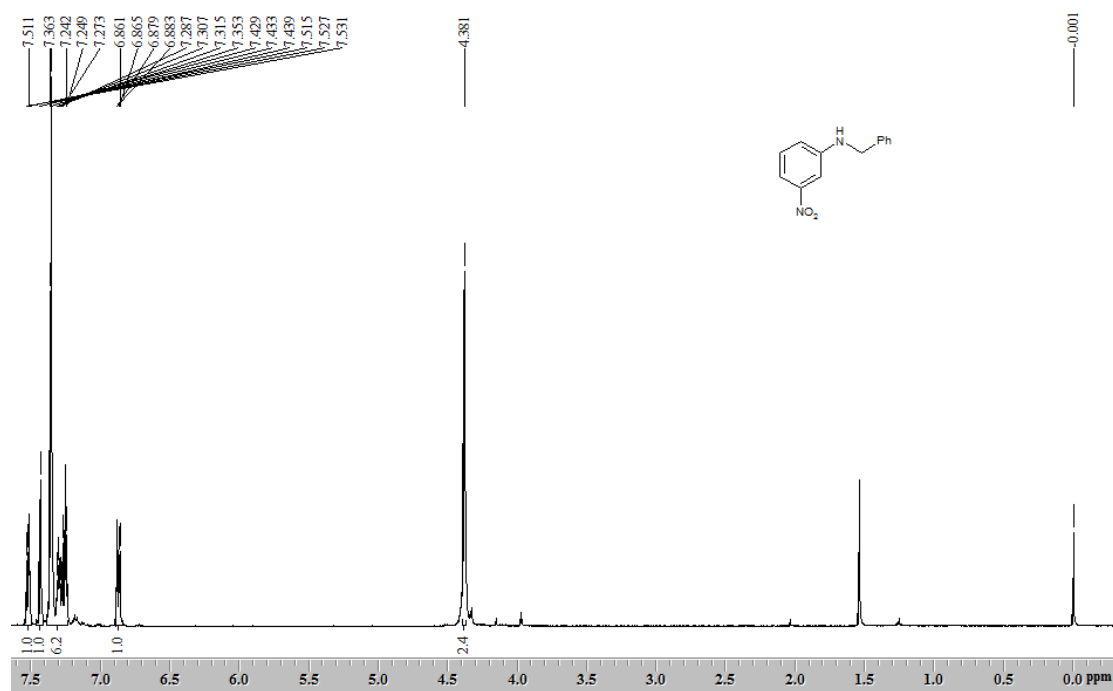

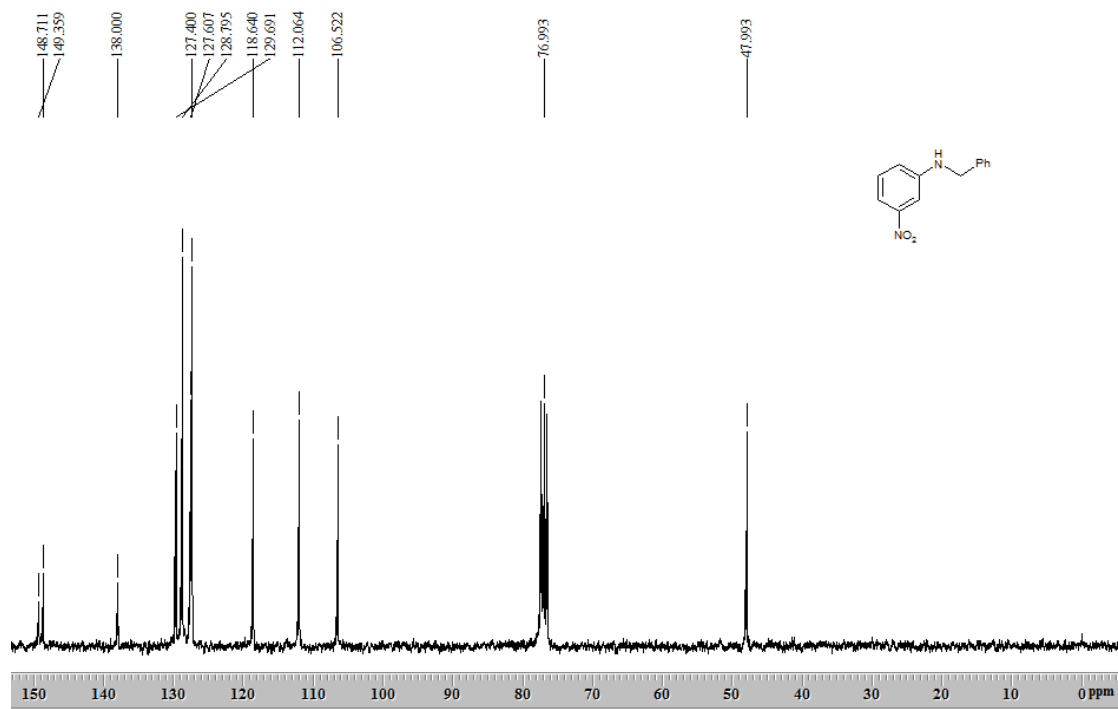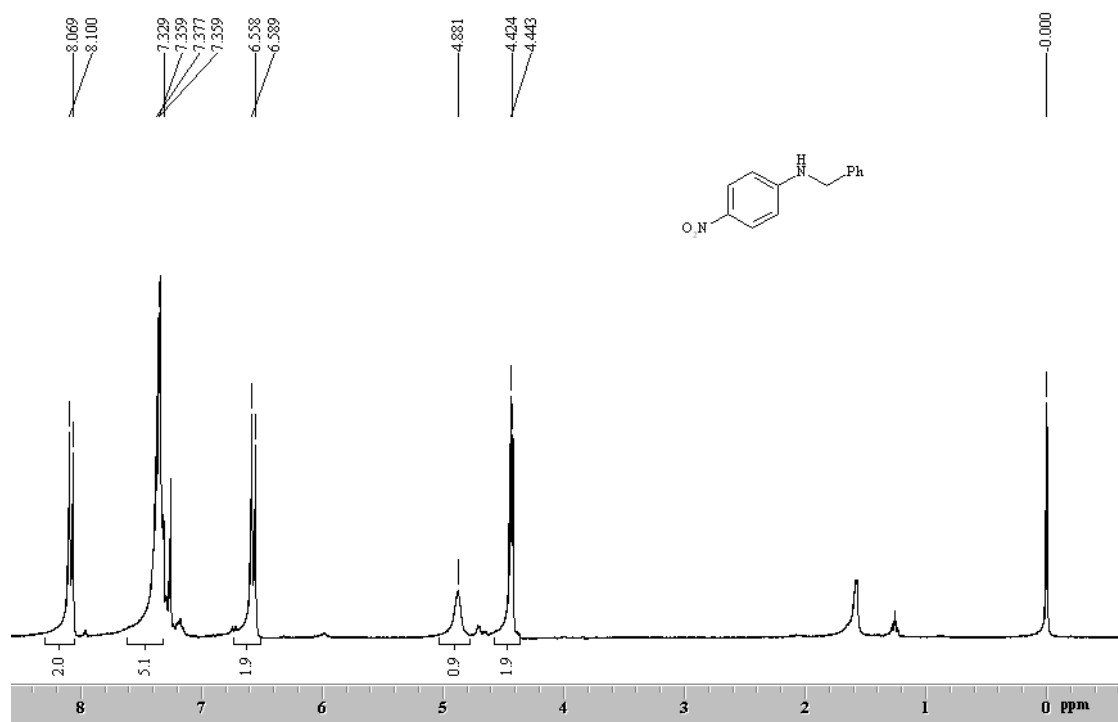

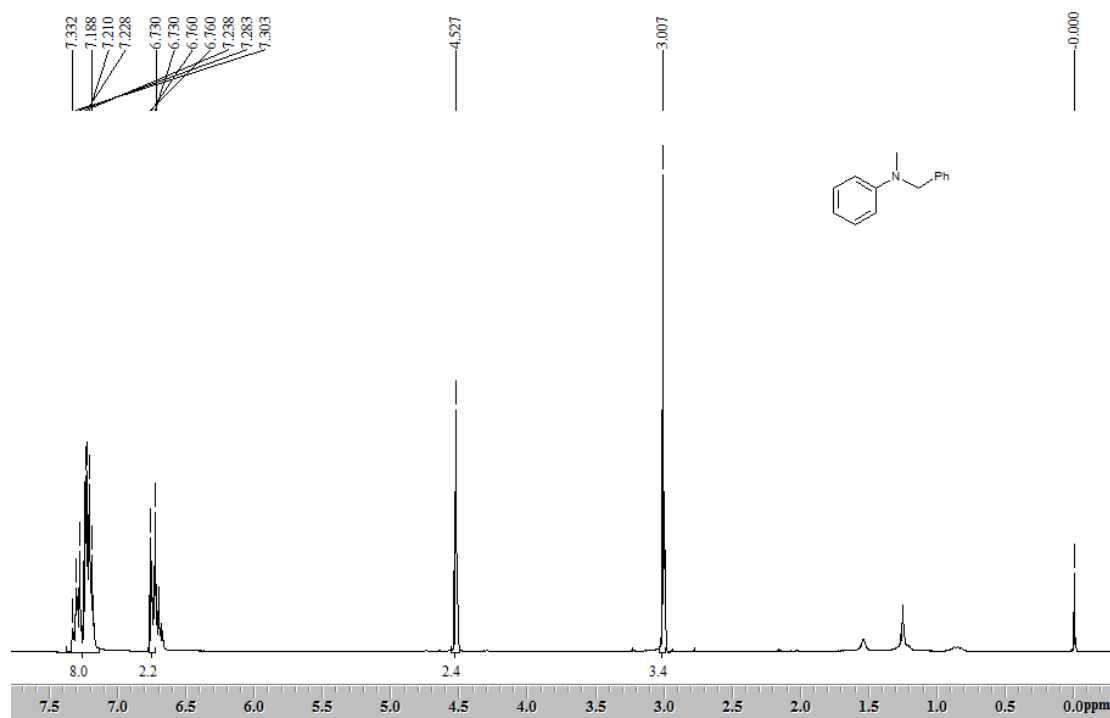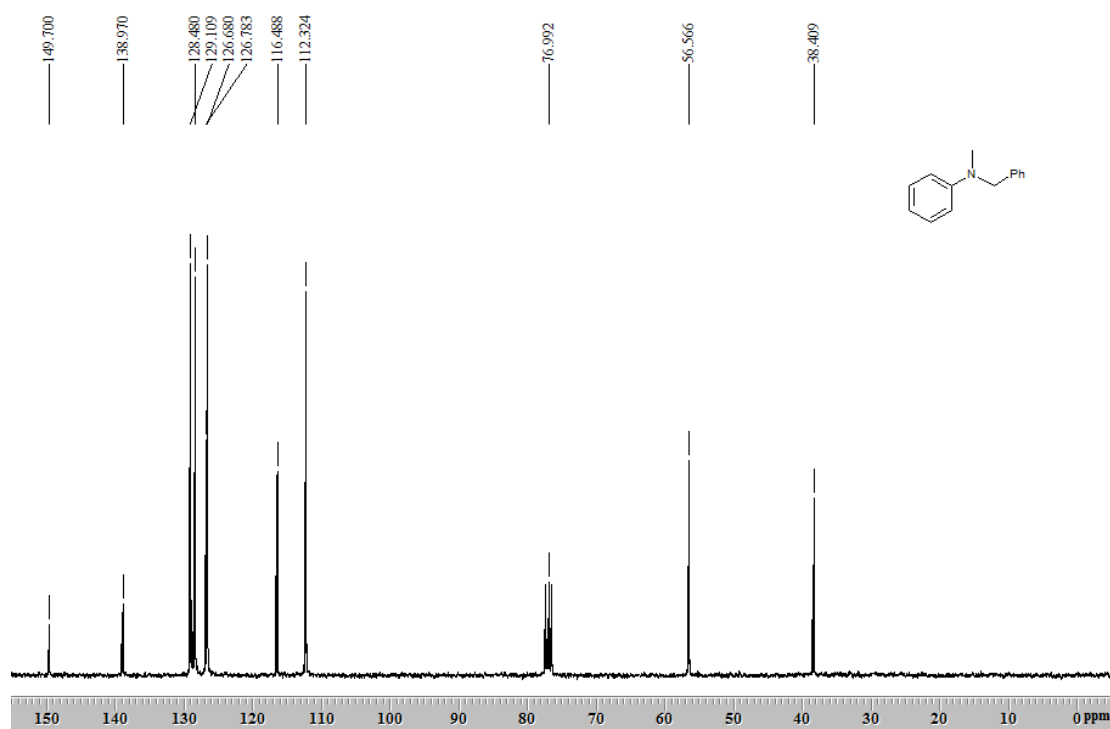

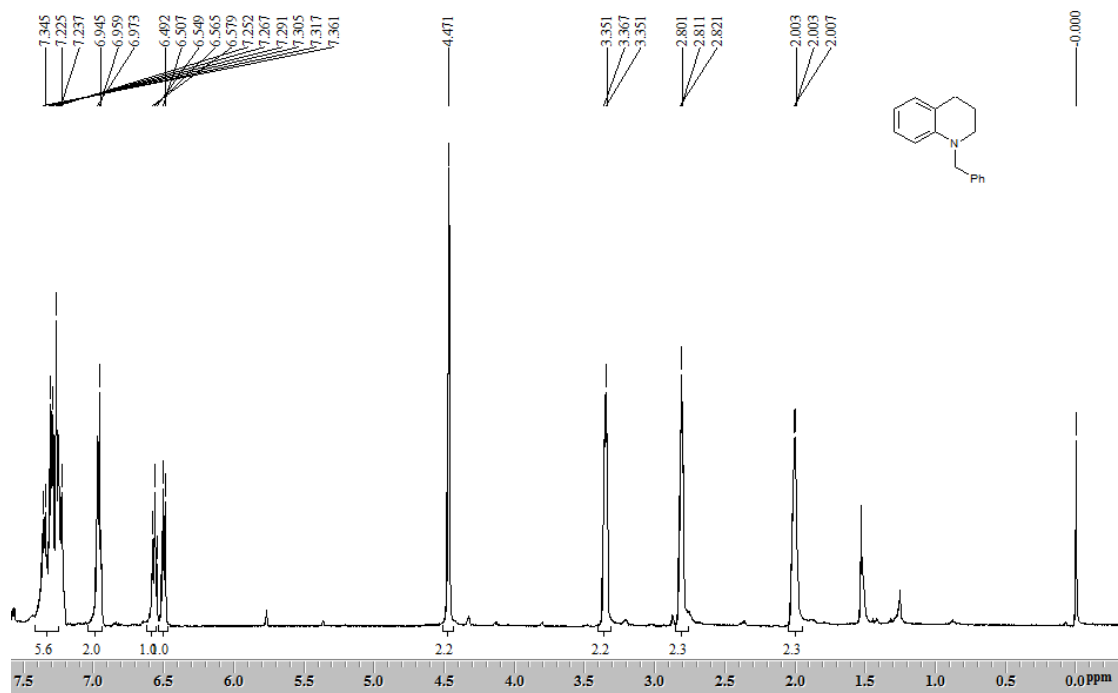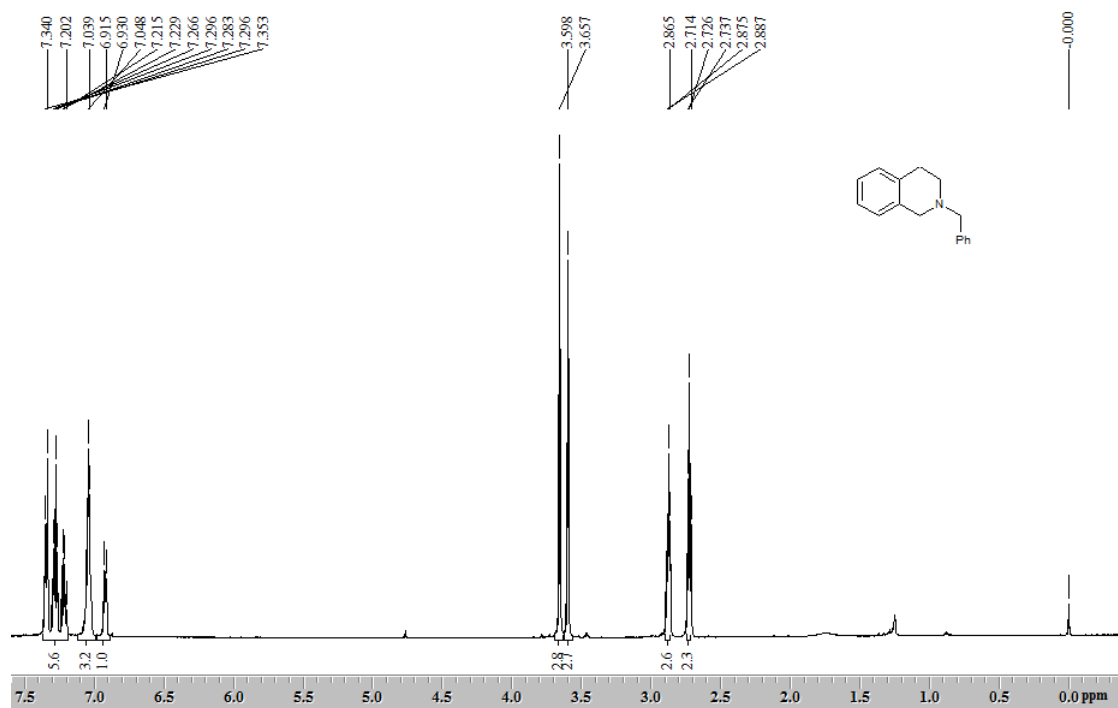



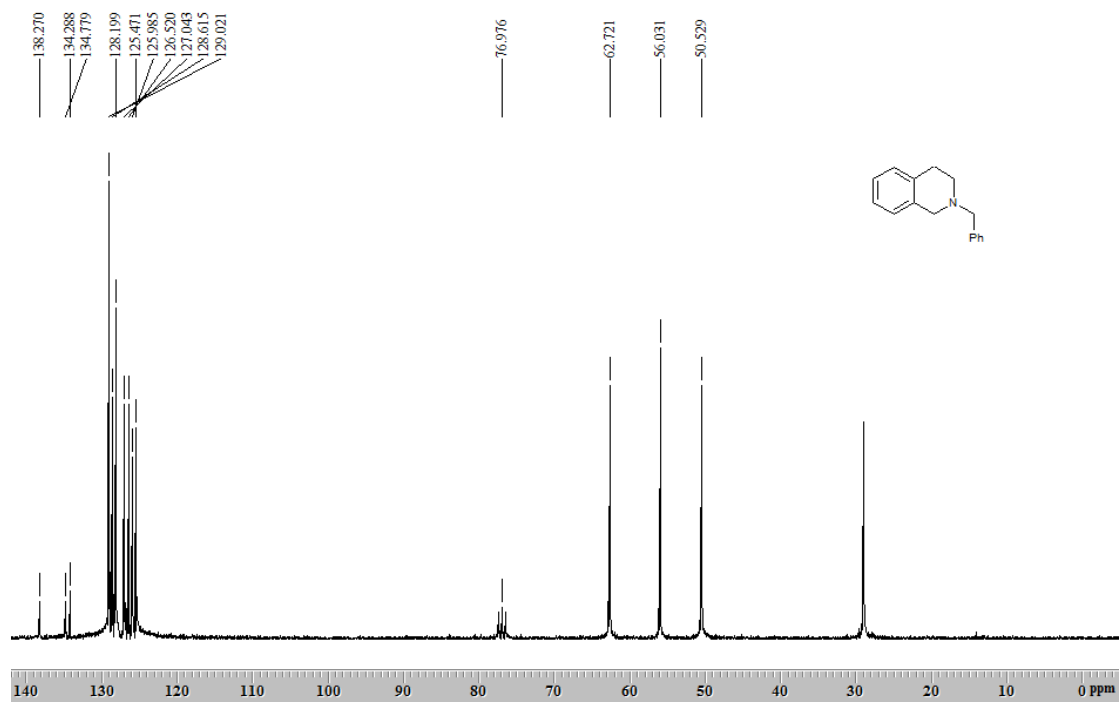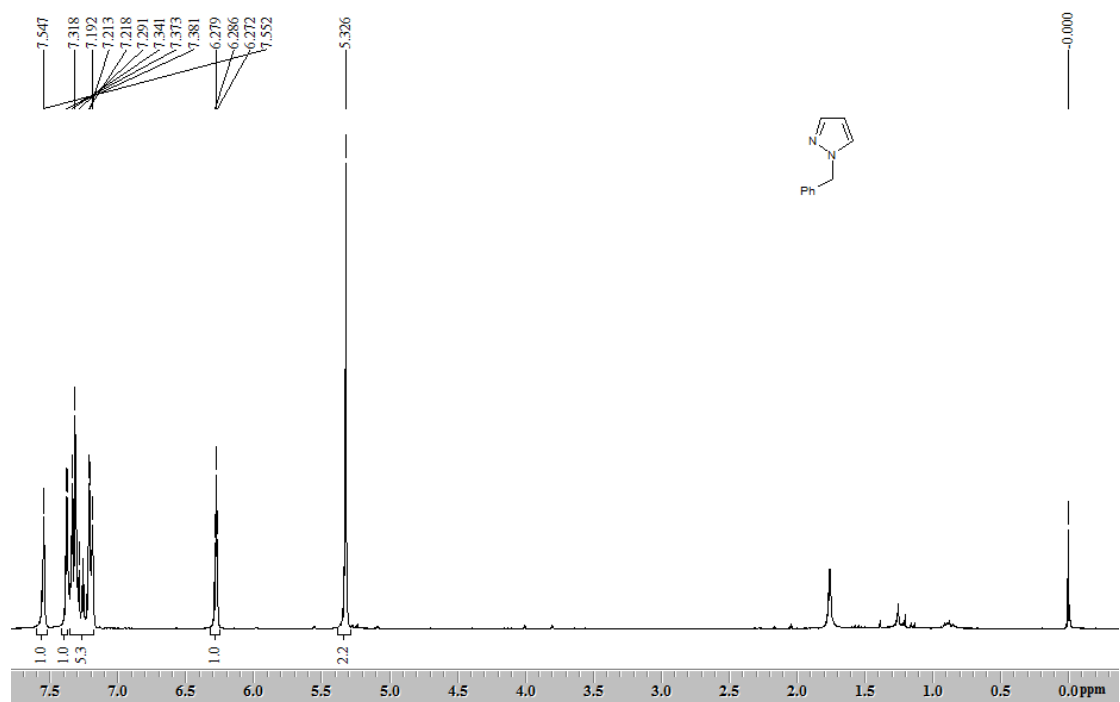

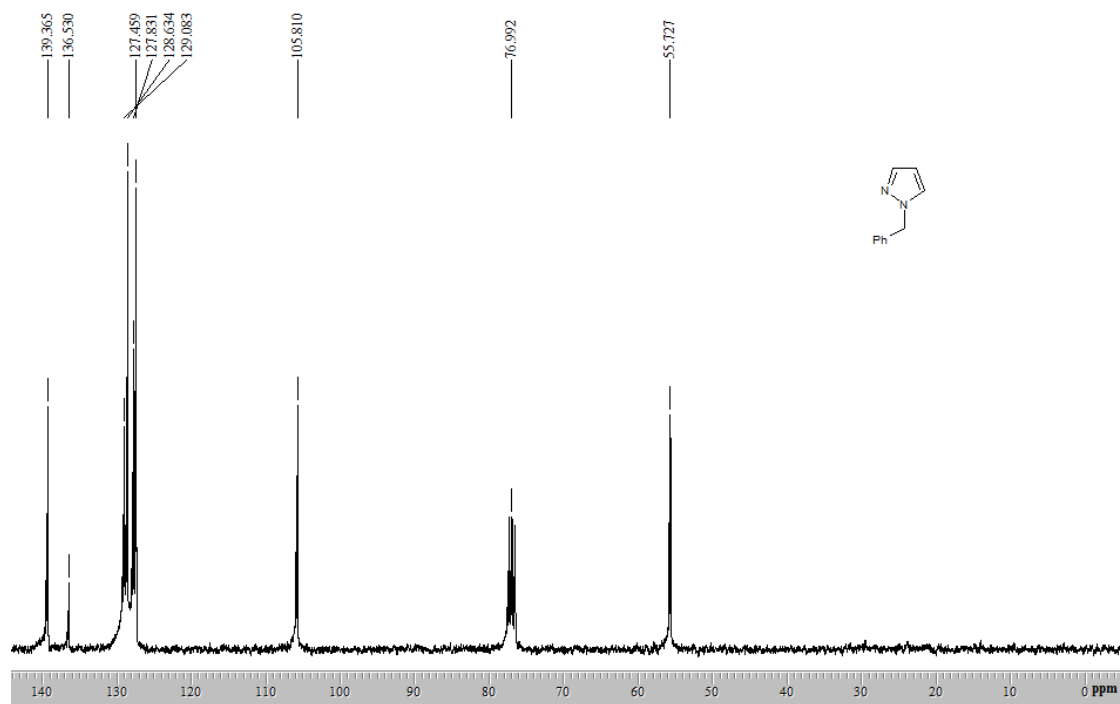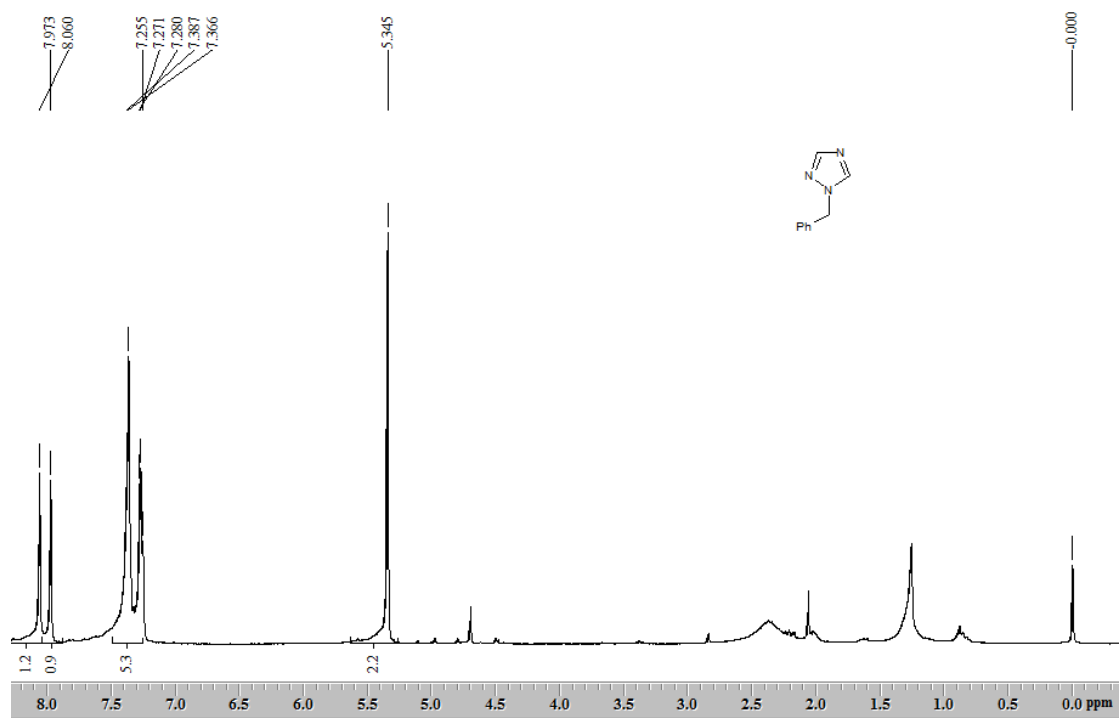

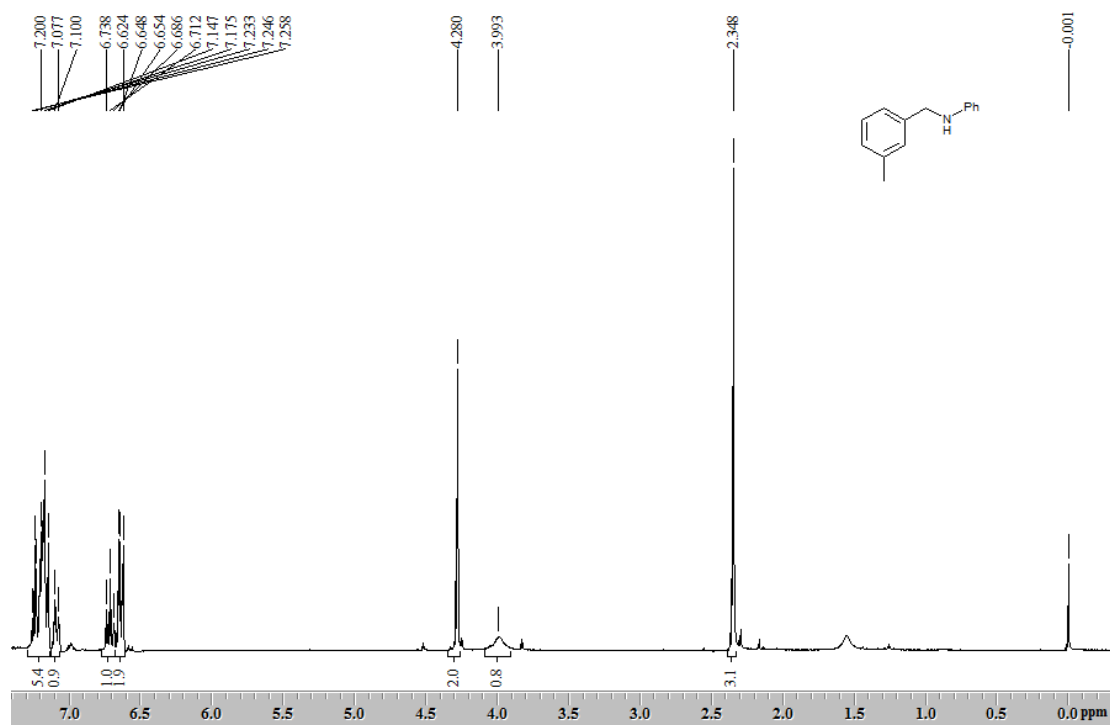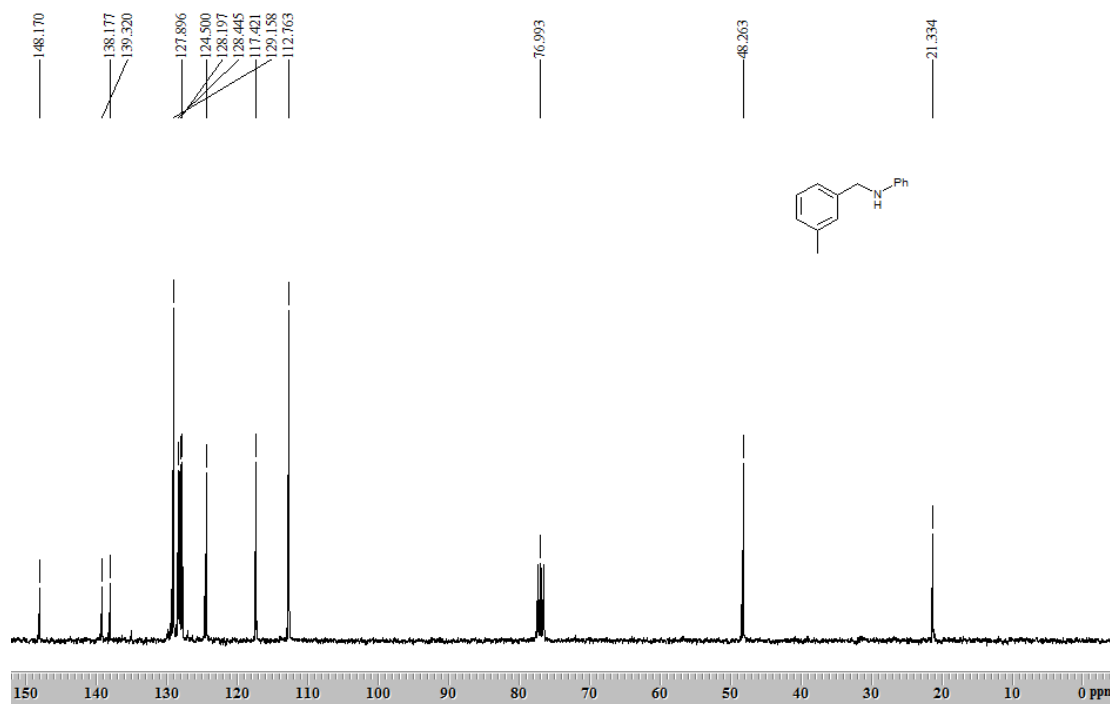

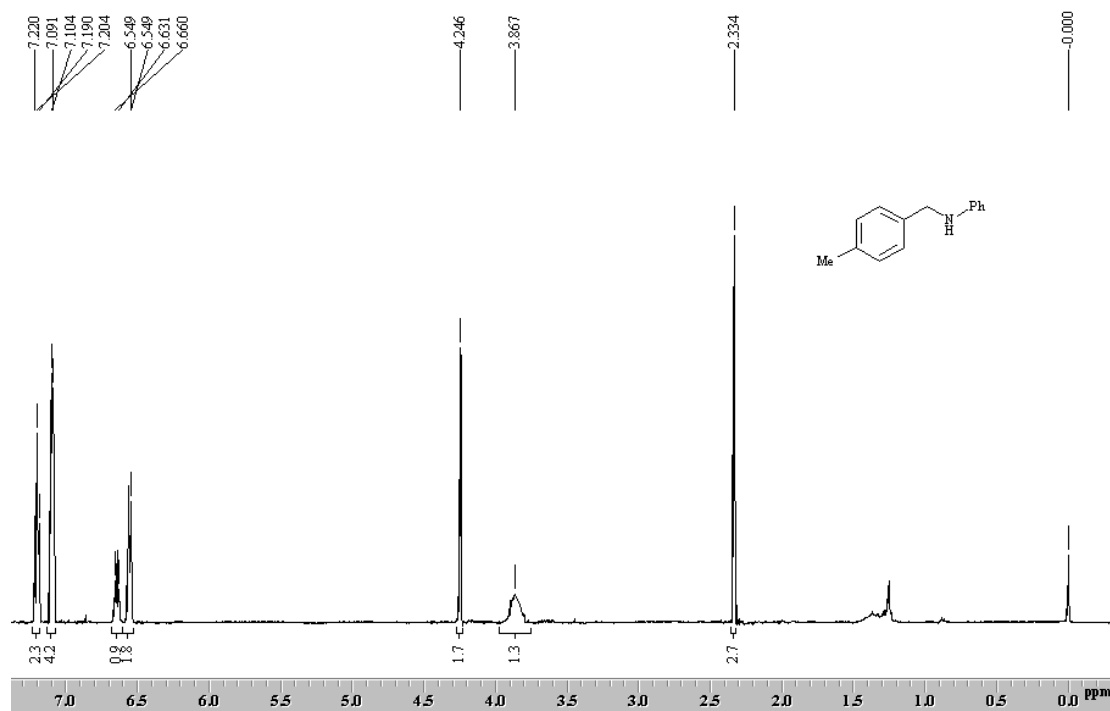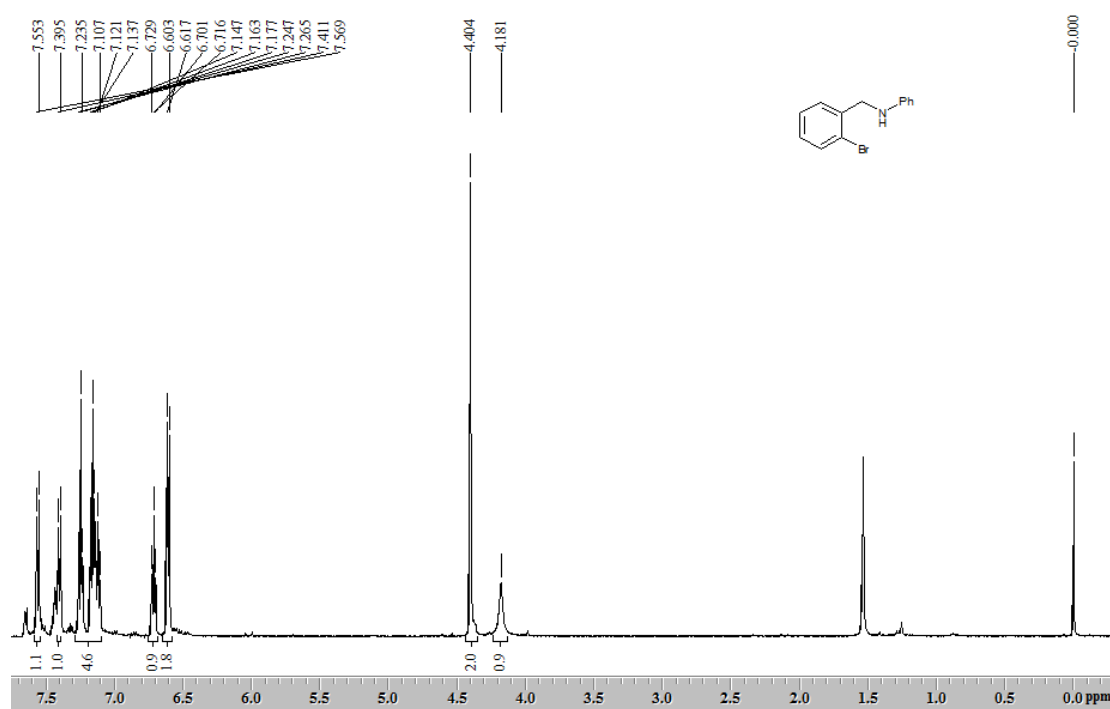

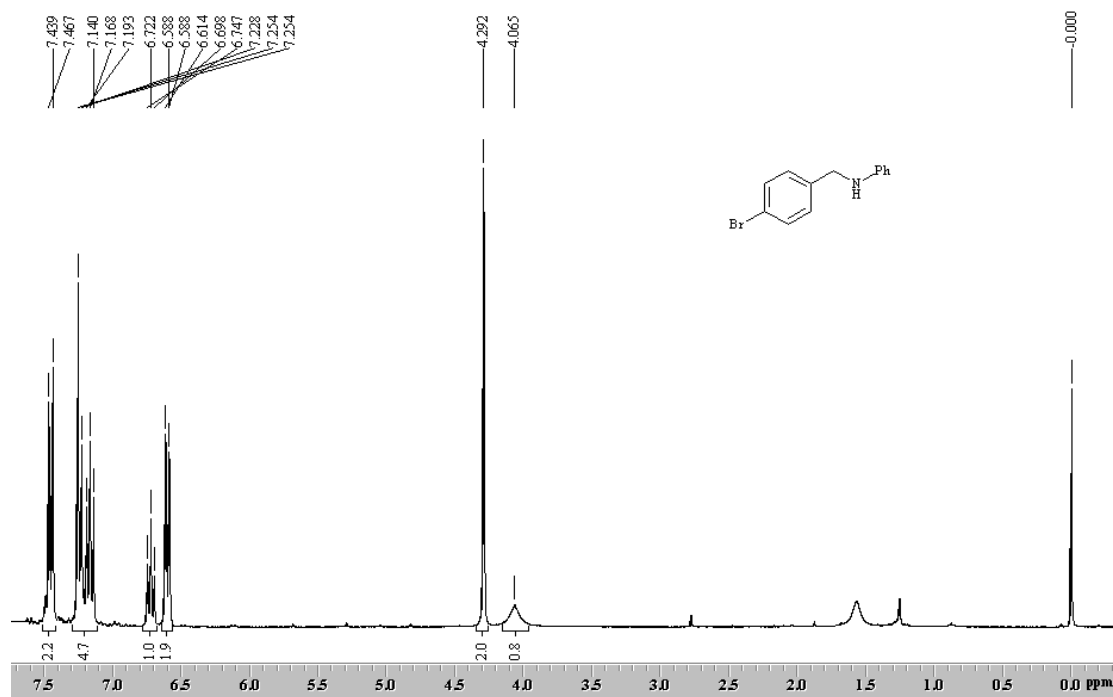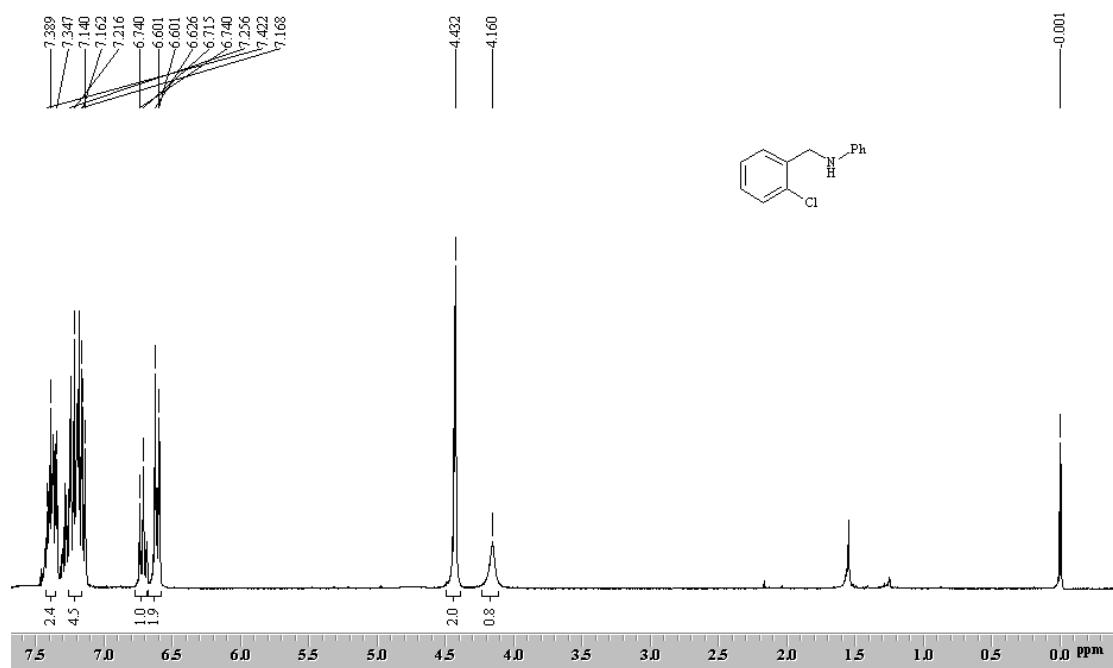

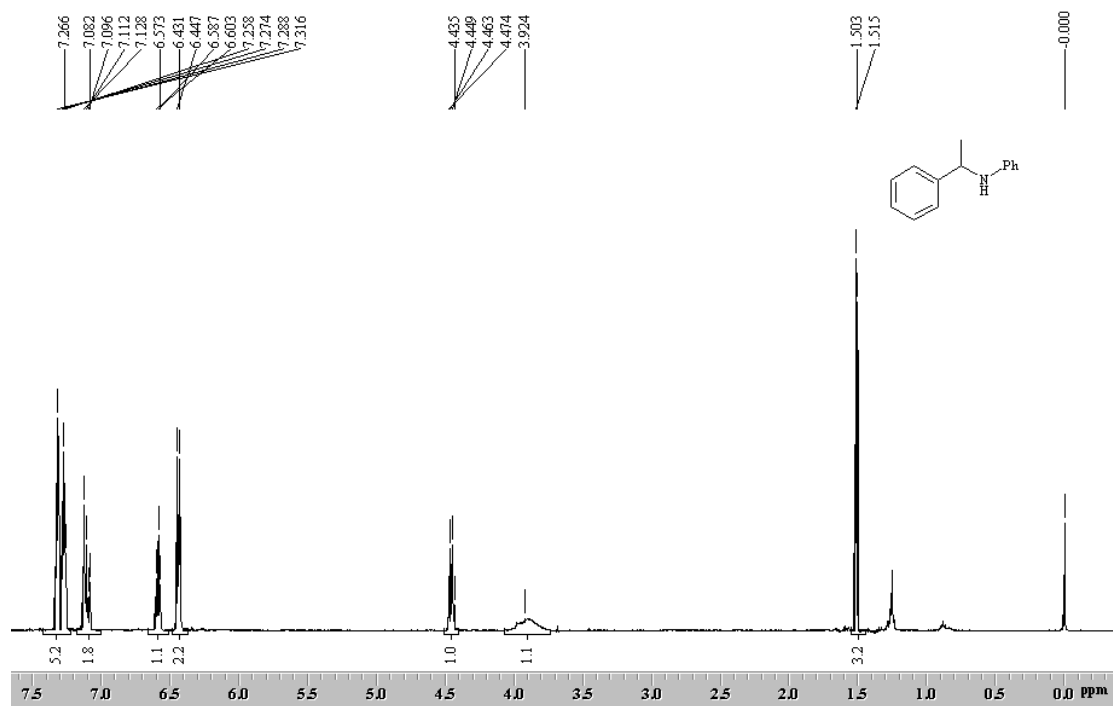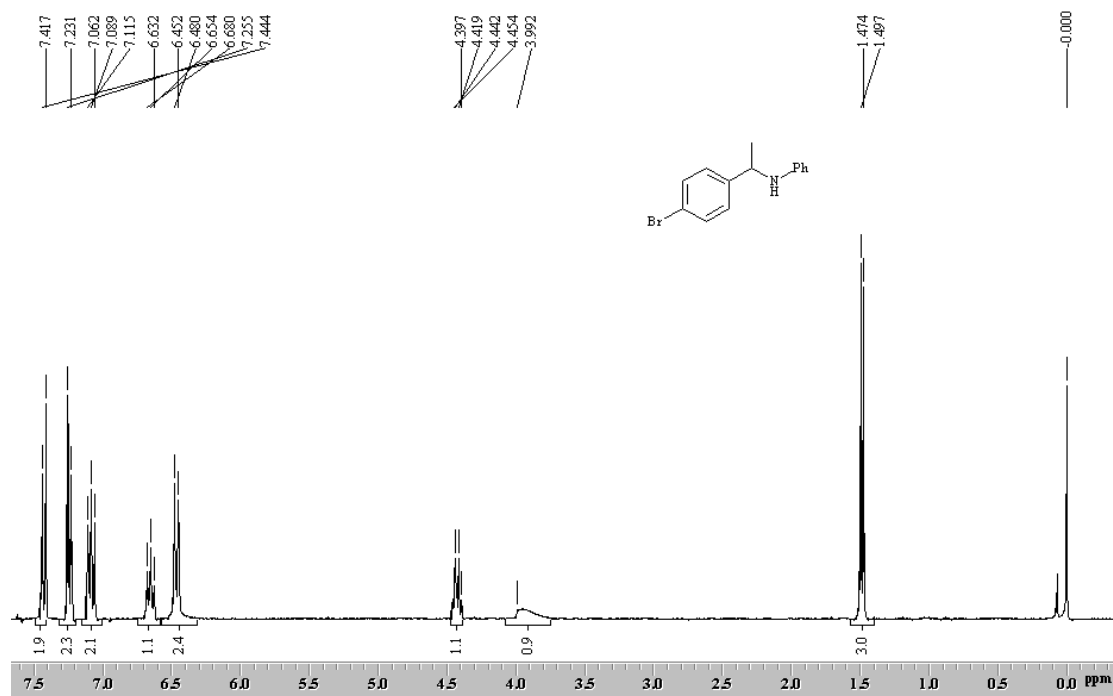

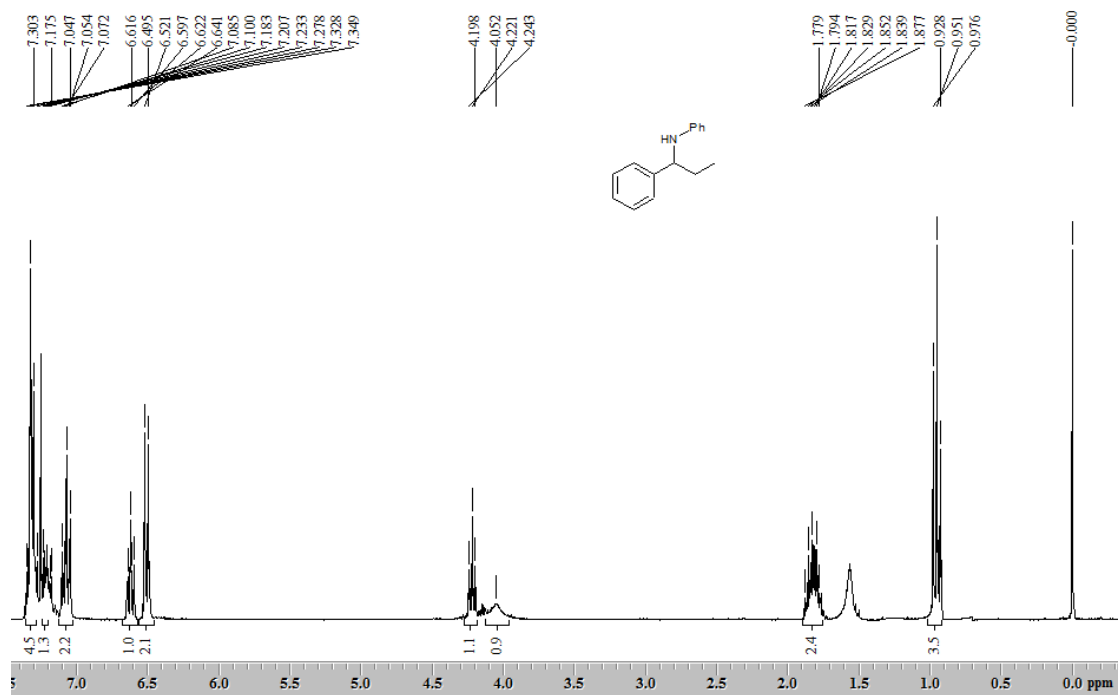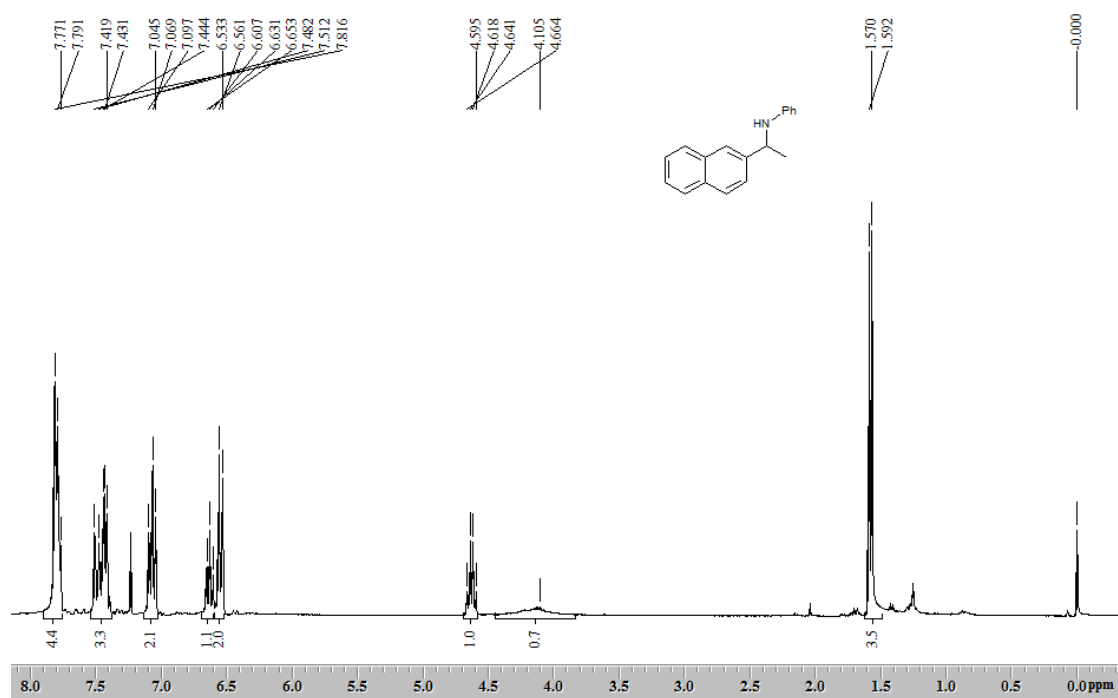

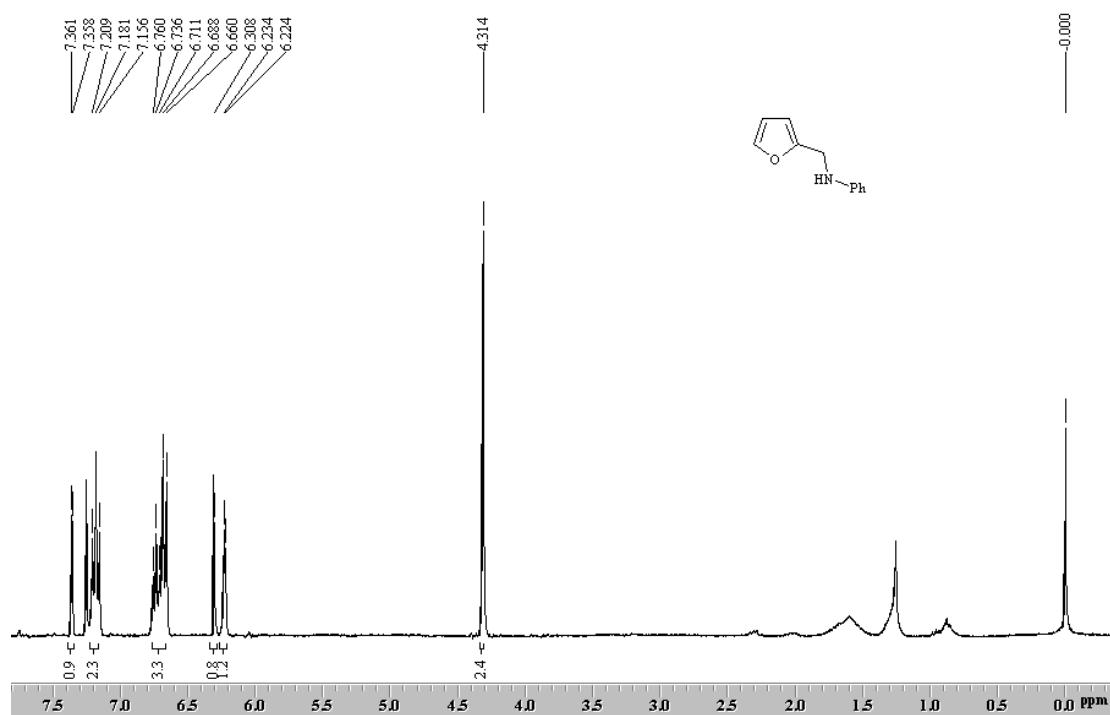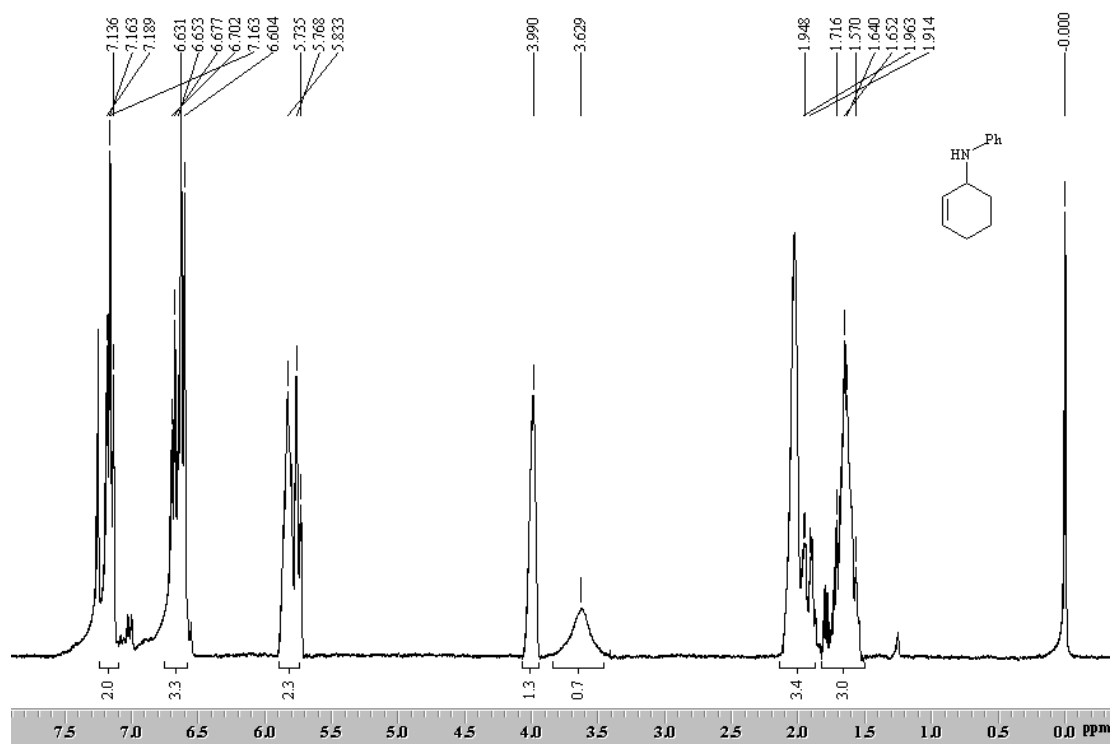



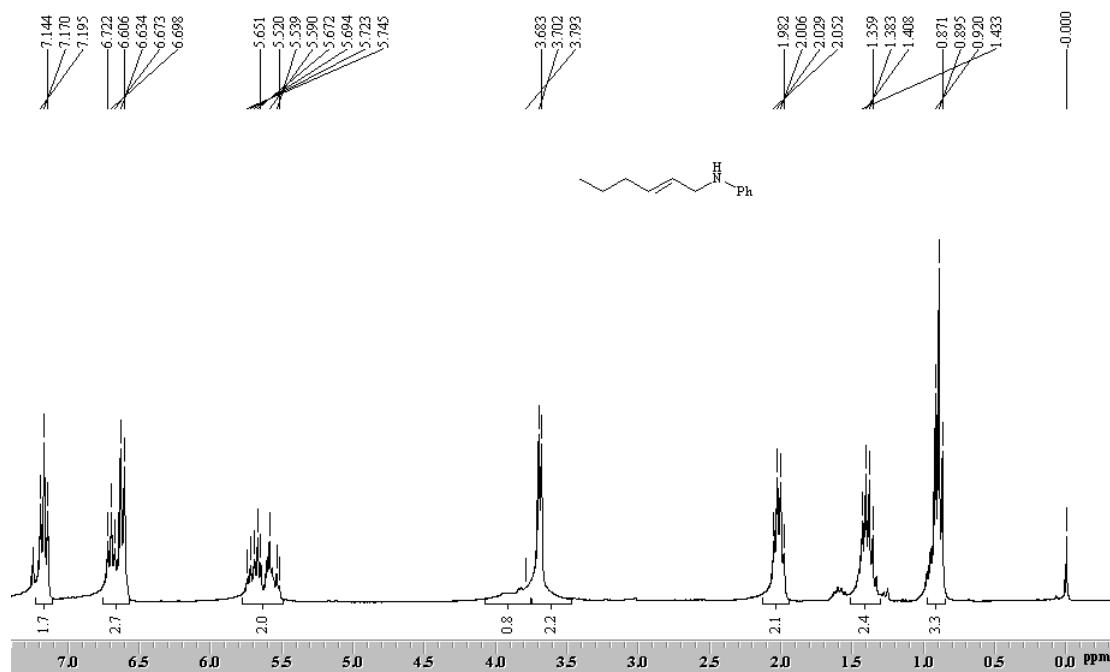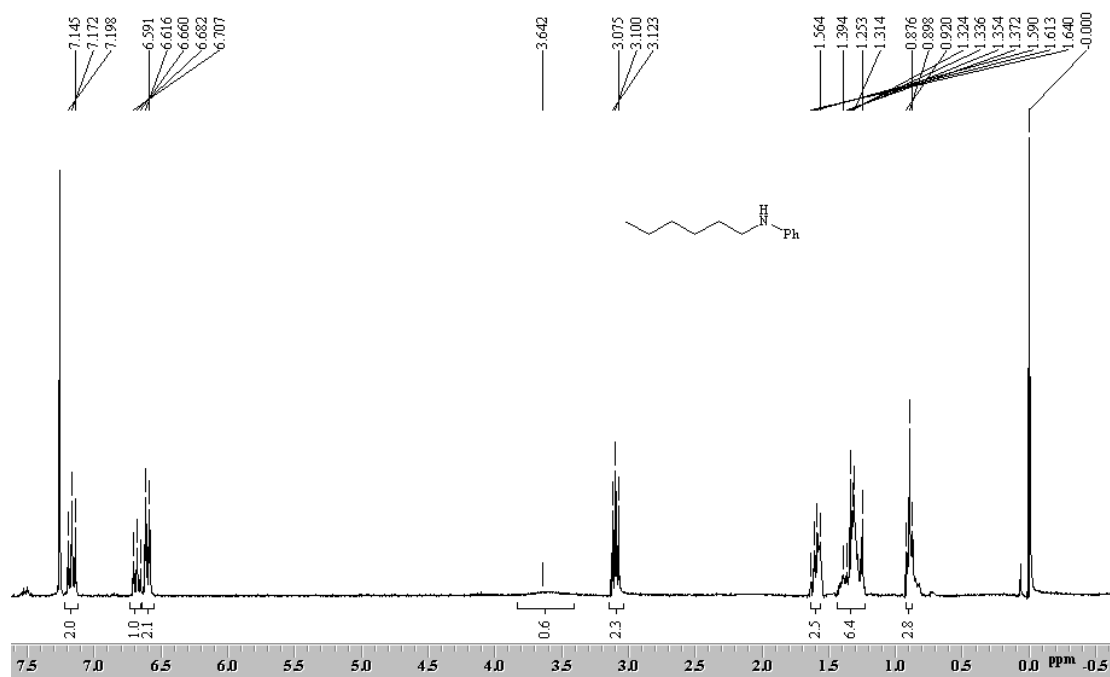

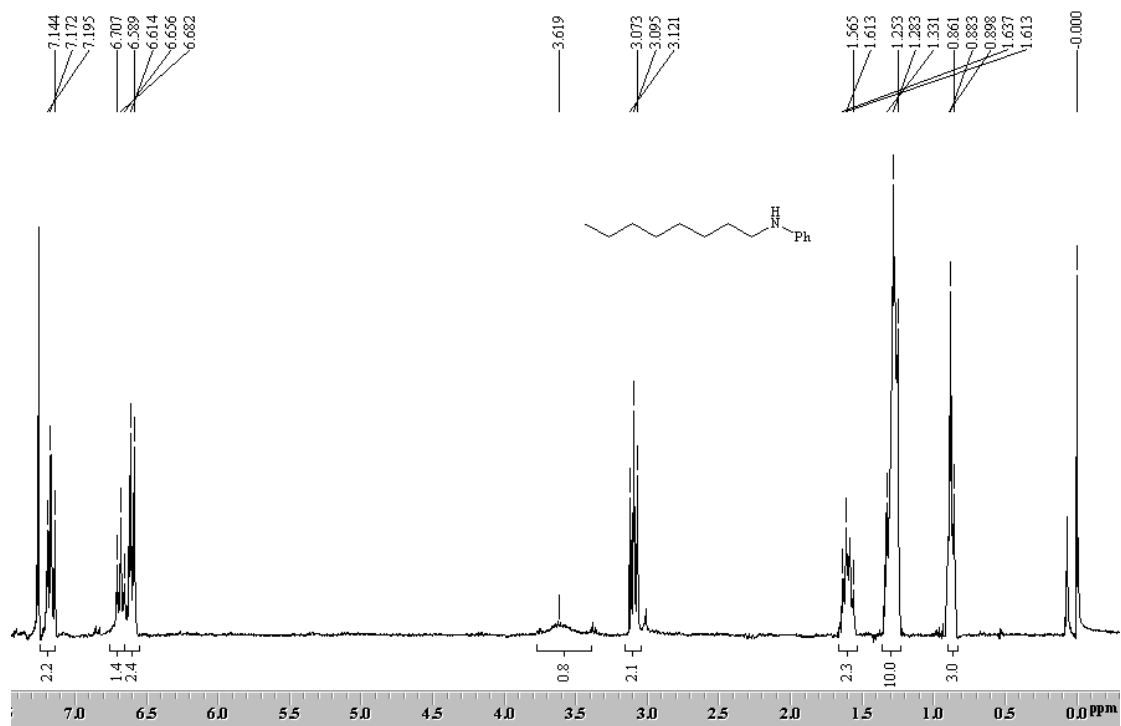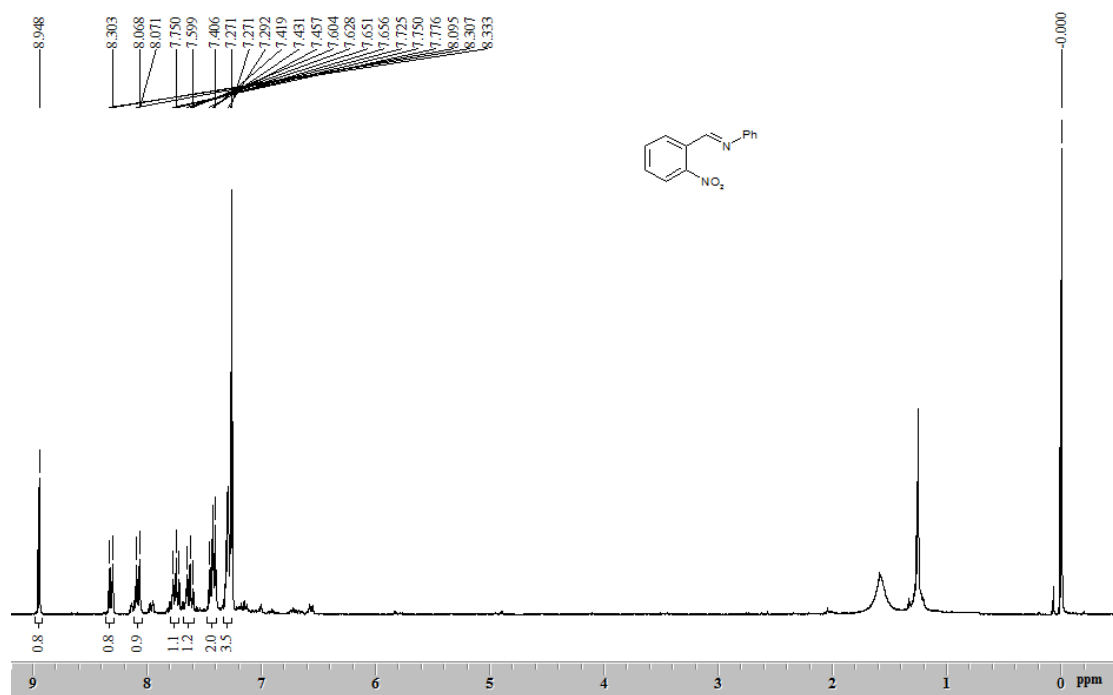

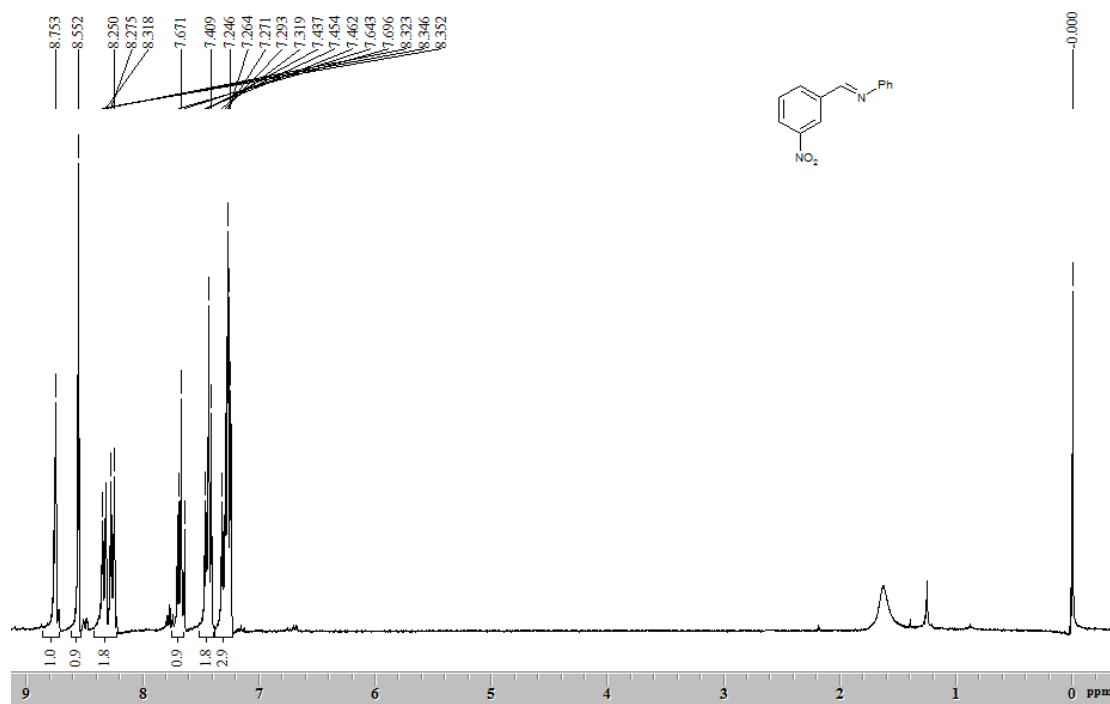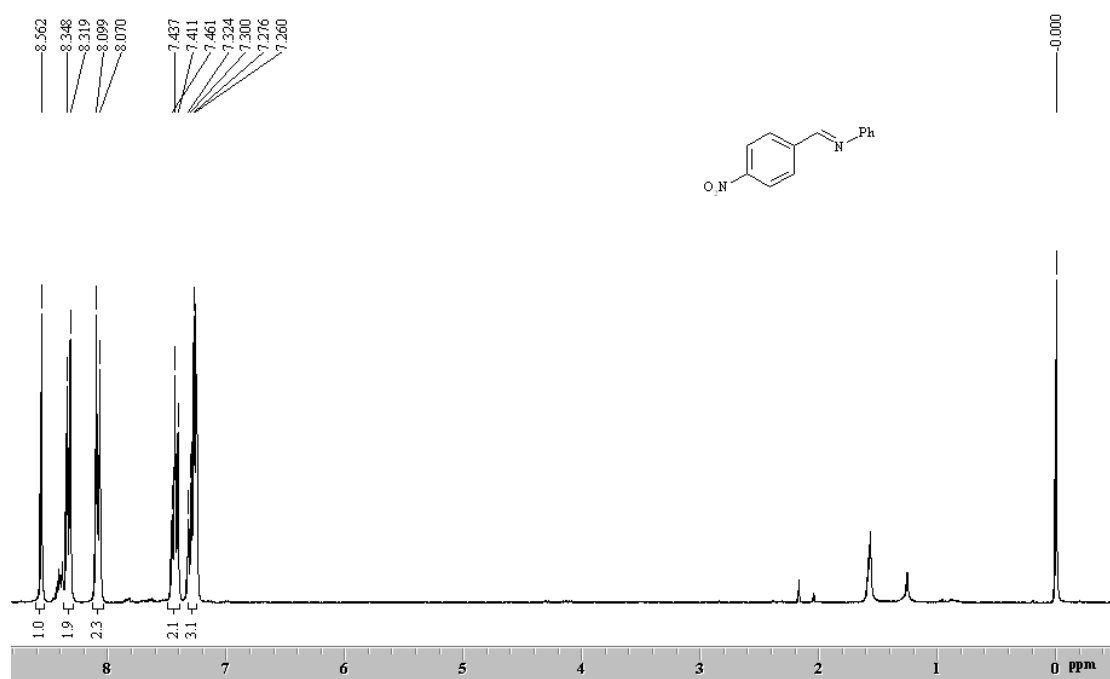

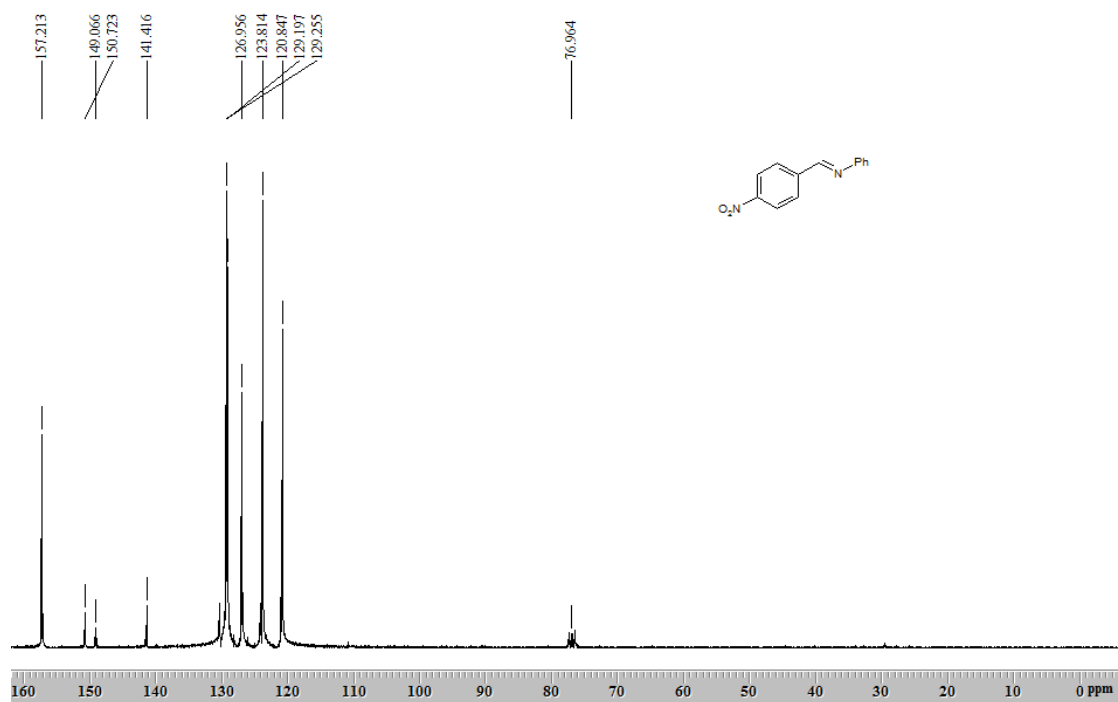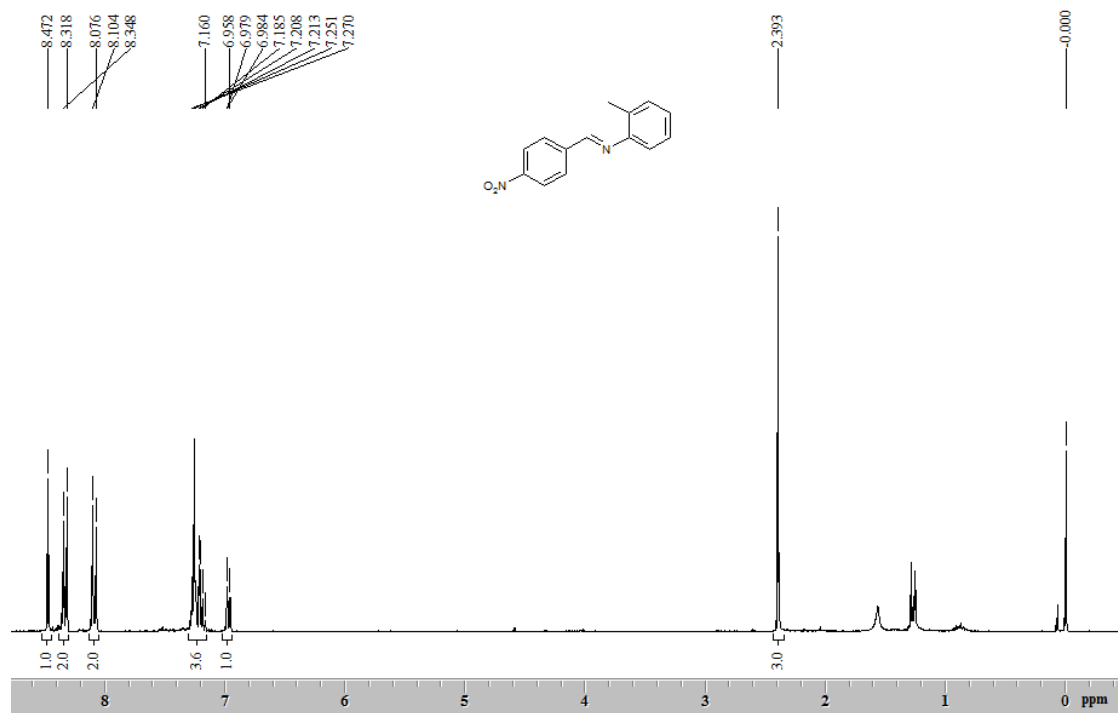

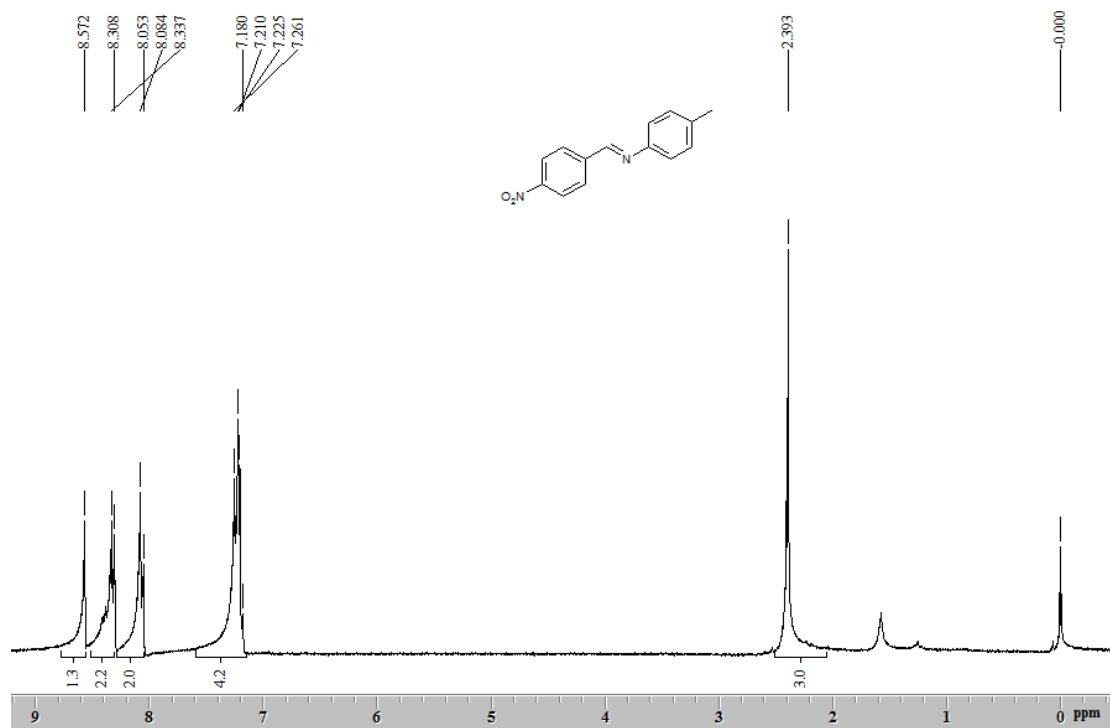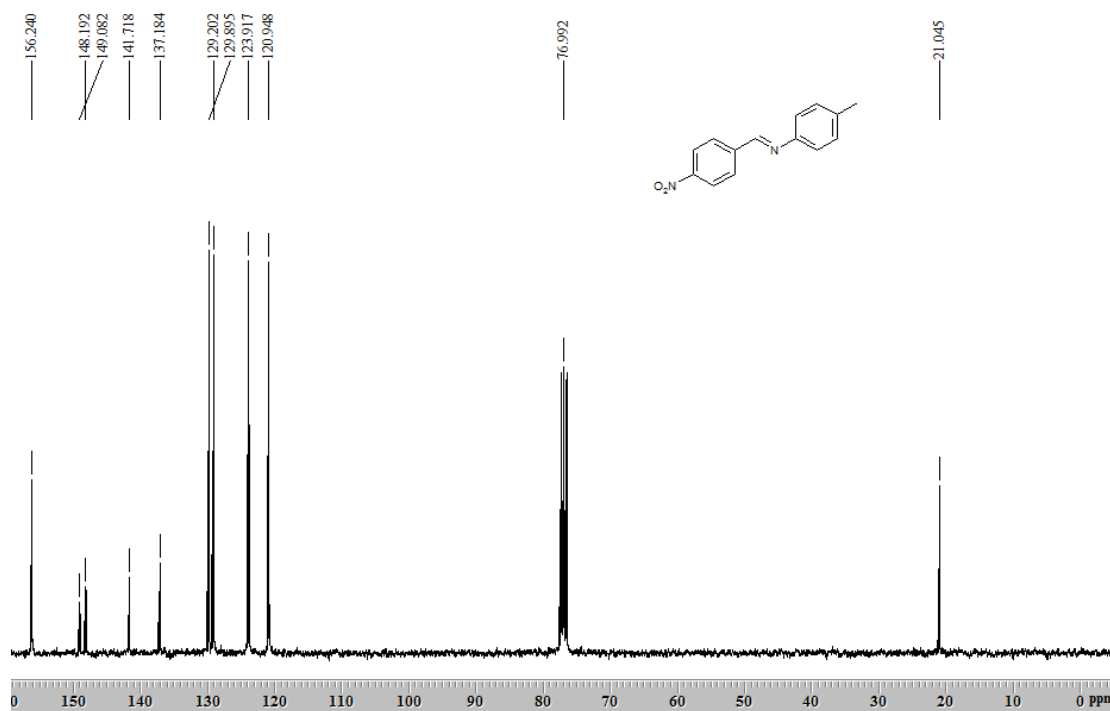

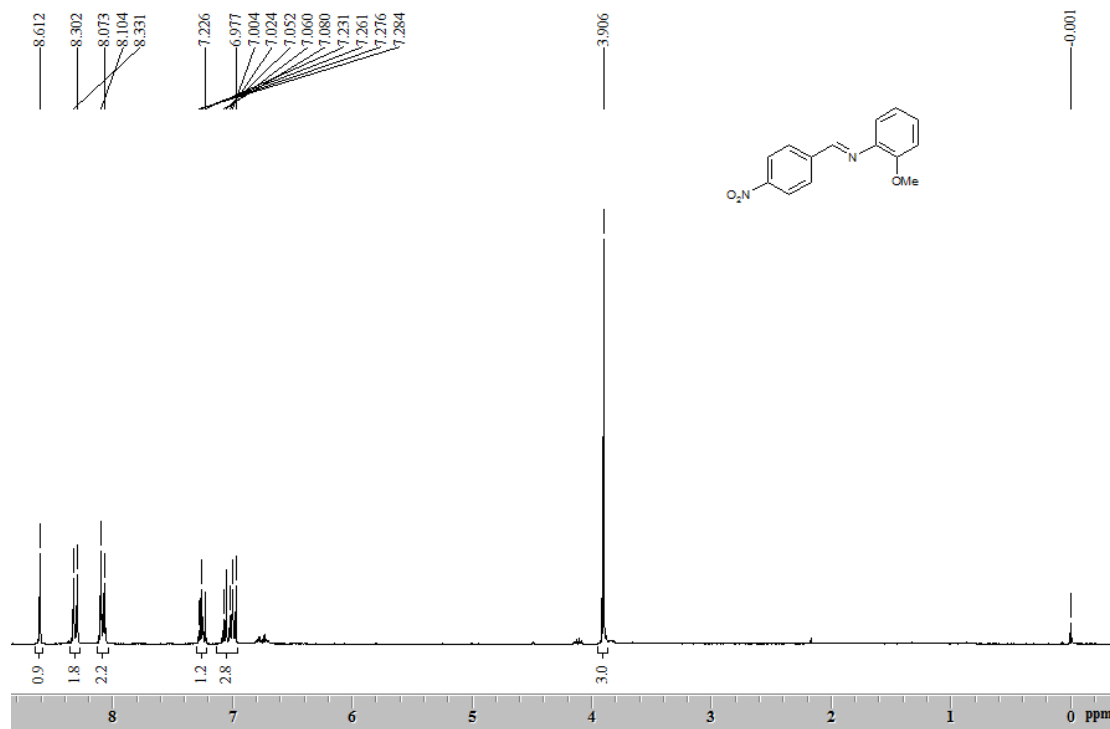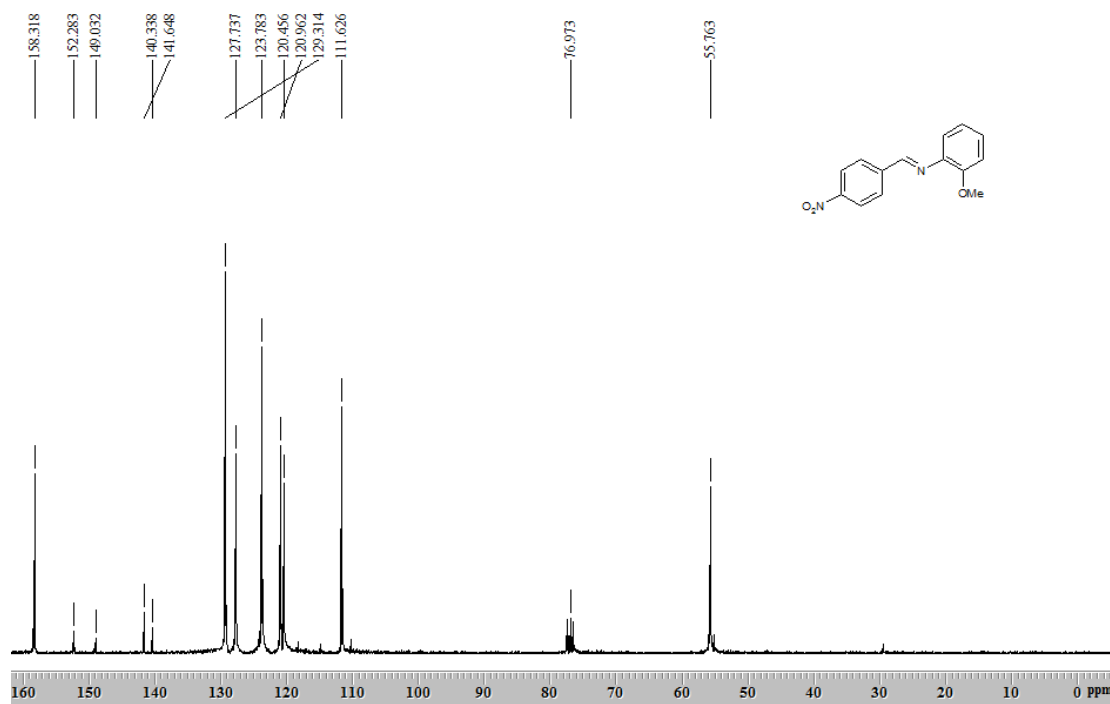

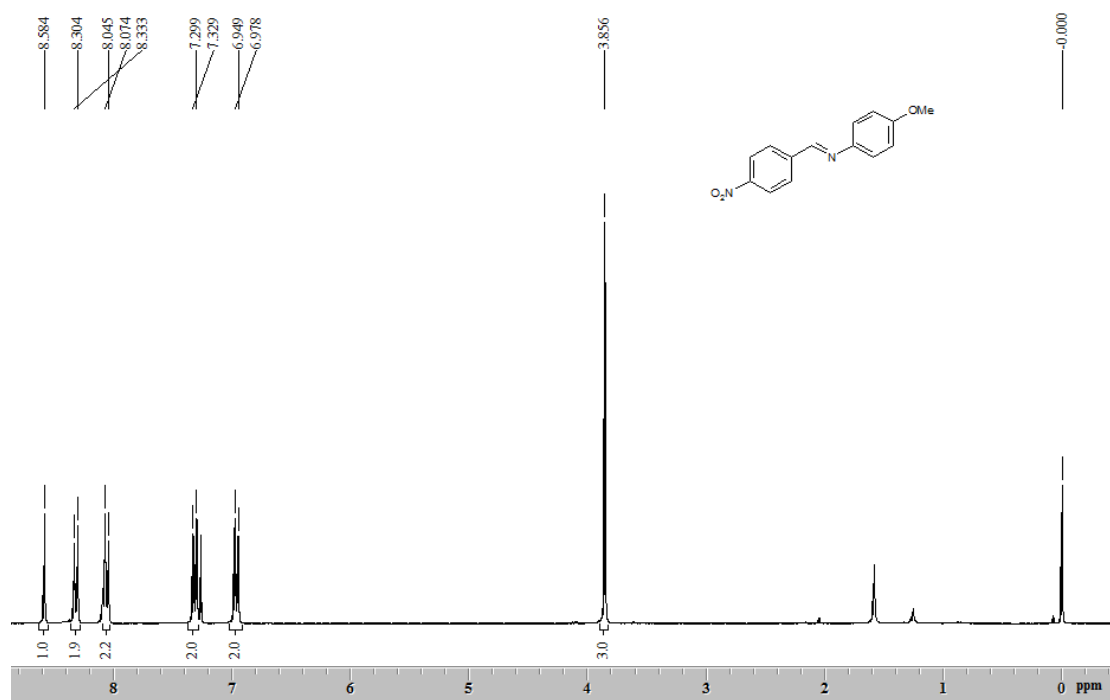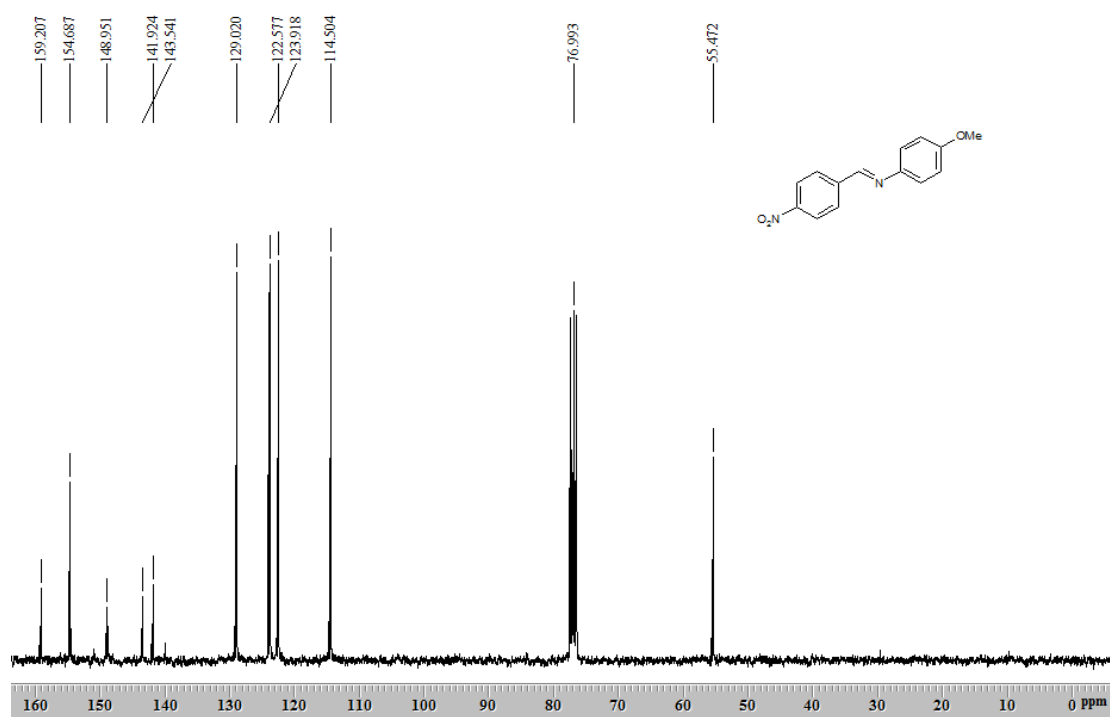

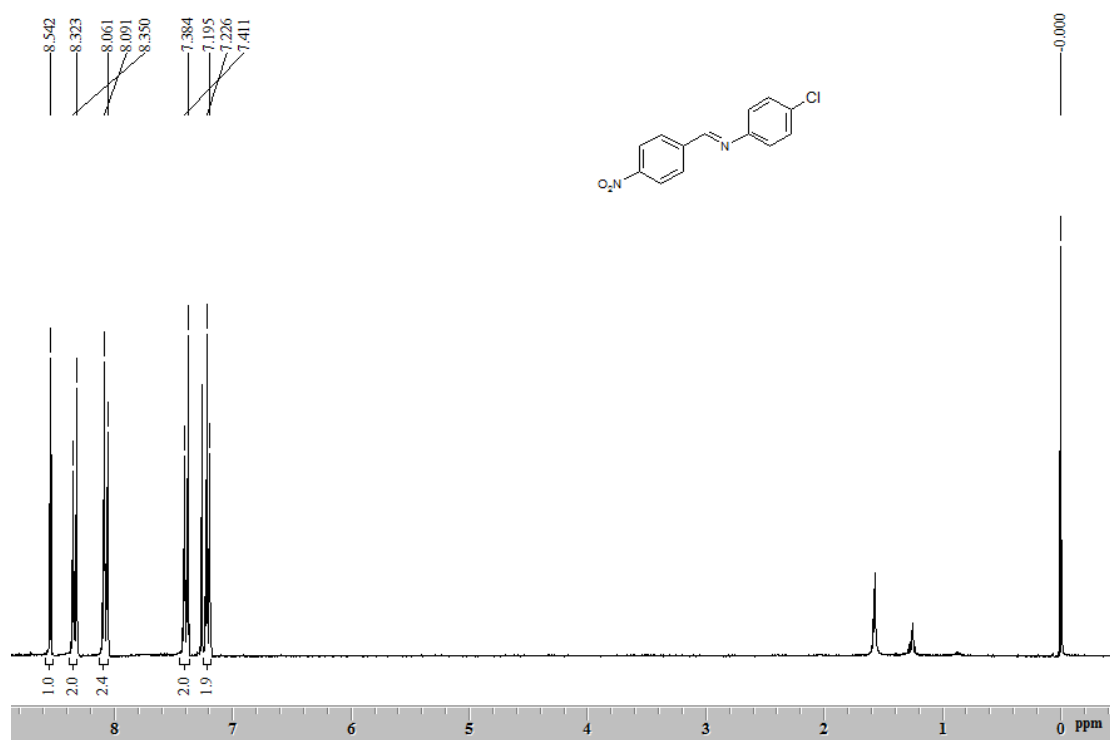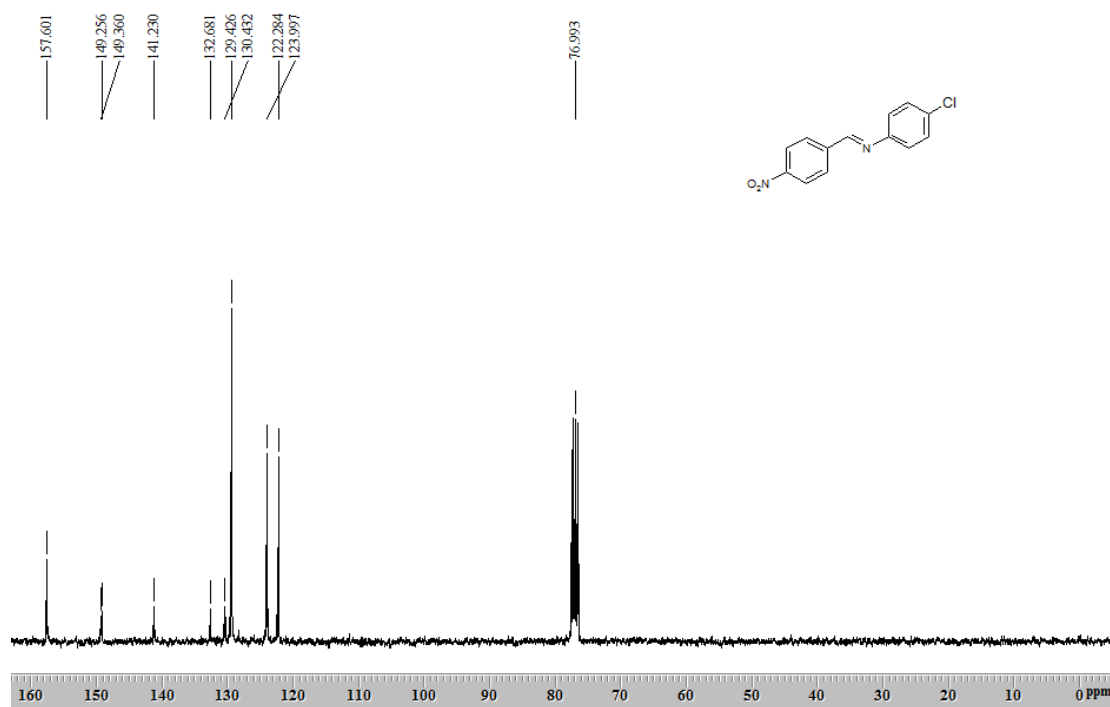



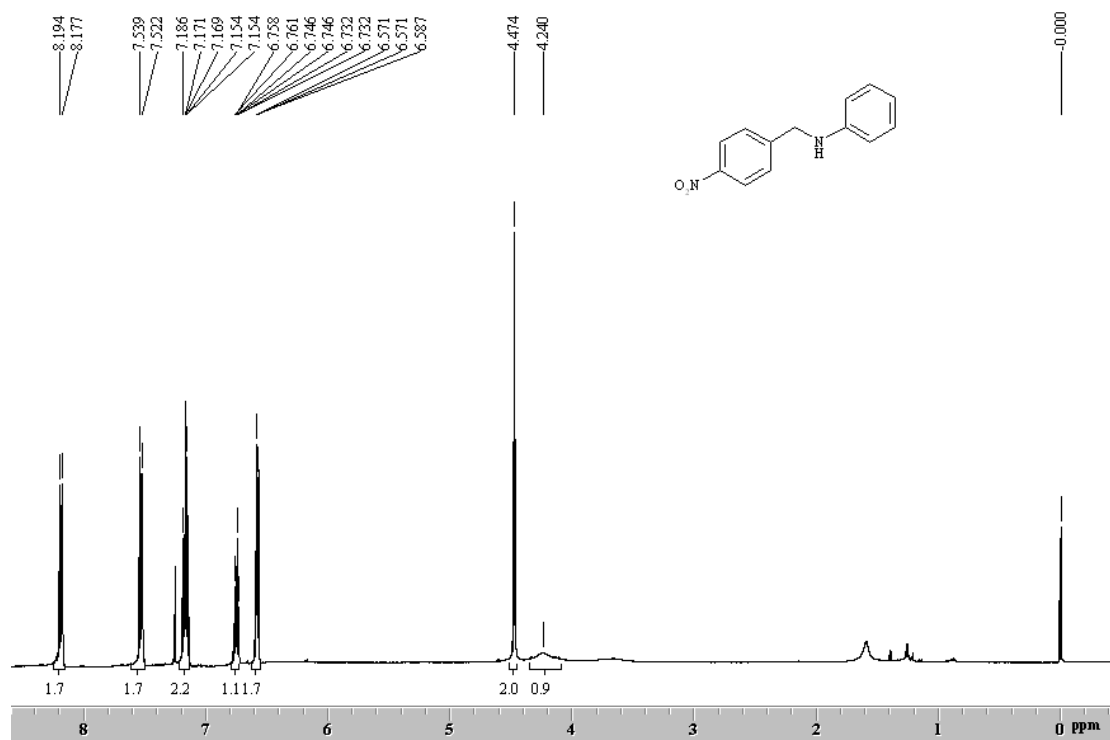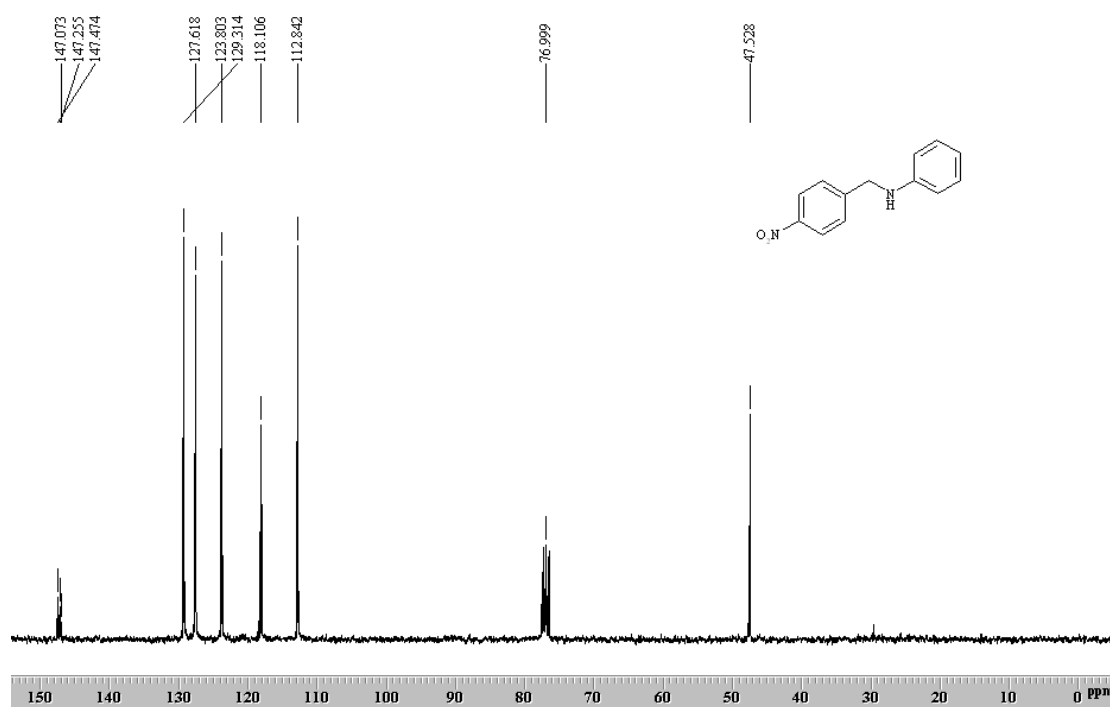

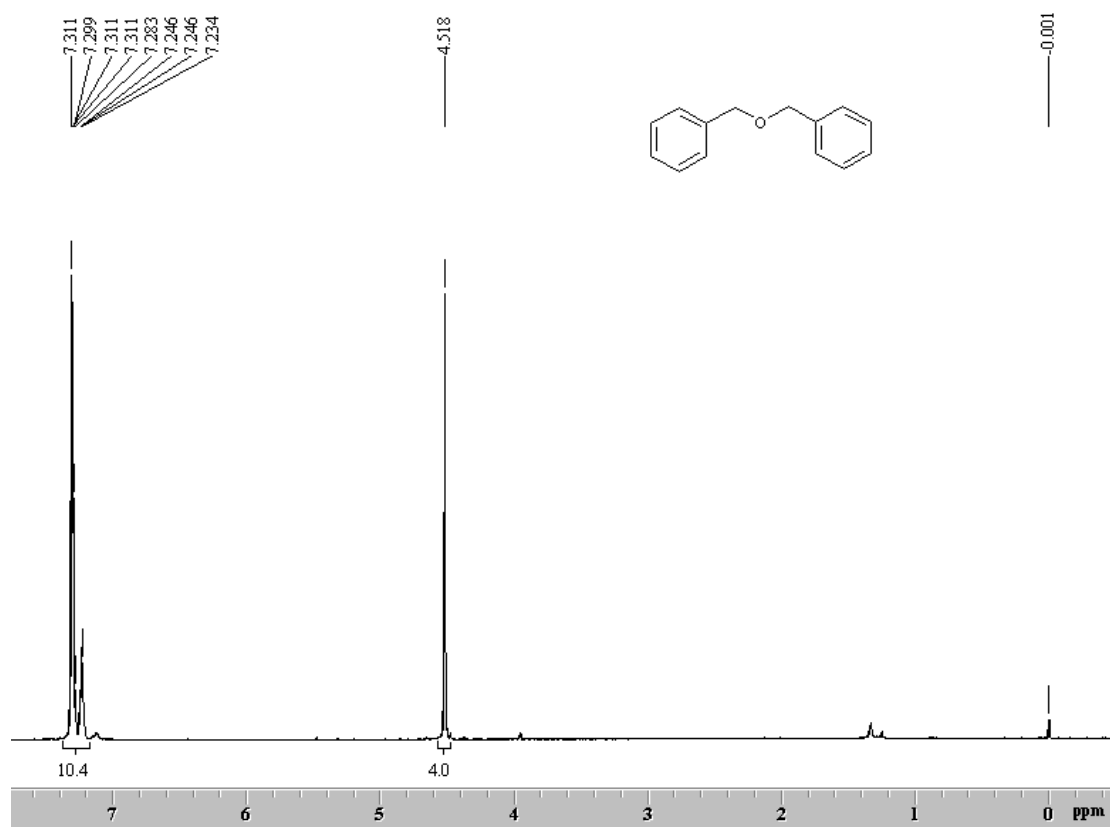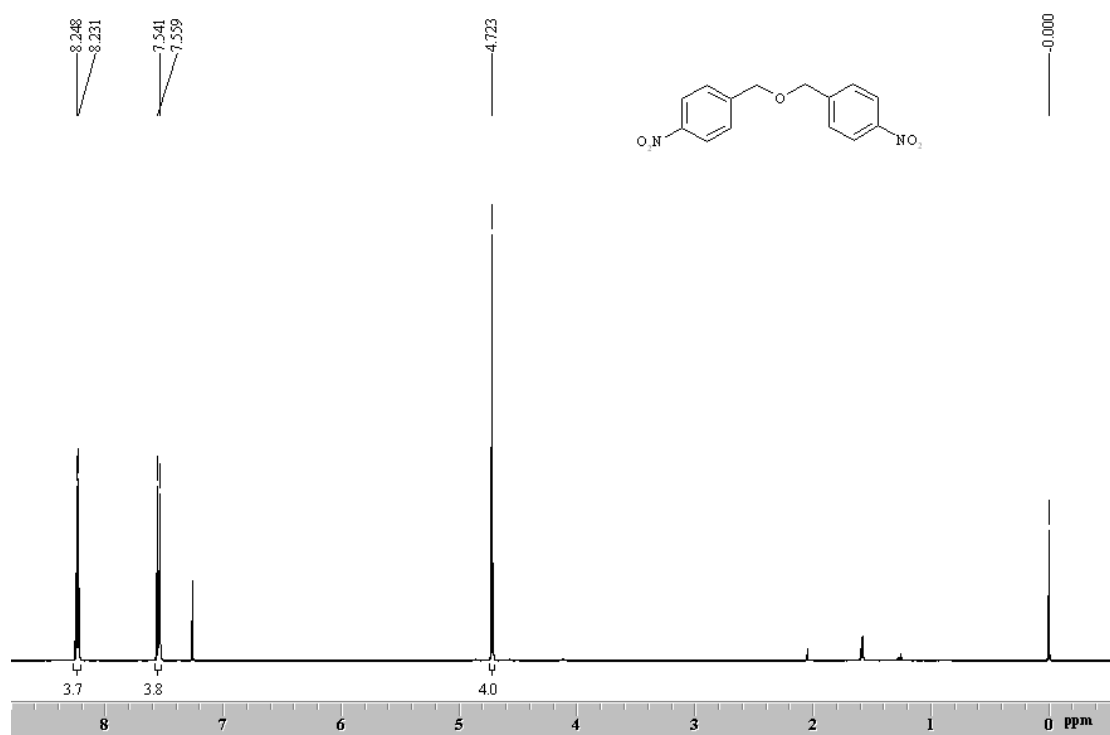

## Notes and references

- 1 T. Yashima and N. Hara, *J. Catal.*, 1972, **27**, 329-333.
- 2 T. Barzetti, E. Selli, D. Moscotti and L. Forni, *J. Chem. Soc., Faraday Trans.*, 1996, **92**, 1401-1407
- 3 R. Kawahara, K. Fujita and R. Yamaguchi, *Adv. Synth. Catal.*, 2011, **353**, 1161–1168.
- 4 C. T. Yang, Y. Fu, Y. B. Huang, J. Yi, Q. X. Guo and L. Liu, *Angew. Chem., Int. Ed.*, 2009, **121**, 7534–7537.
- 5 J. P. Wolfe and S. L. Buchwald, *J. Org. Chem.*, 1997, **62**, 1264-1267.
- 6 Y. Zhao, S. W. Foo and S. Saito, *Angew. Chem., Int. Ed.*, 2011, **50**, 3006-3009.
- 7 X. Cui, Y. Zhang, F. Shi, and Y. Deng, *Chem. Eur. J.*, 2011, **17**, 2587–2591.
- 8 P. R. Likhar, R. Arundhathi, M. L. Kantam and P. S. Prathima, *Eur. J. Org. Chem.*, 2009, 5383–5389.
- 9 V. Kumar, U. Sharma, P. K. Verma, N. Kumar and B. Singh, *Adv. Synth. Catal.*, 2012, **354**, 870–878.
- 10 S. Hayat, Atta-ur-Rahman, M. I. Choudhary, K. M. Khan, W. Schumann and E. Bayer, *Tetrahedron*, 2001, **57**, 9951-9957.
- 11 M. Zhang, H. Yang, Y. Zhang, C. Zhu, W. Li, Y. Cheng and H. Hu, *Chem. Commun.*, 2011, **47**, 6605–6607.
- 12 A. Hu, M. Ogasawara, T. Sakamoto, A. Okada, K. Nakajima, T. Takahashi and W. Lin, *Adv. Synth. Catal.*, 2006, **348**, 2051-2056.
- 13 Z. Wang, C. Wang, L. Zhou and J. Sun, *Org. Biomol. Chem.*, 2013, **11**, 787–797.
- 14 H. Duan, S. Sengupta, J. L. Petersen, N. G. Akhmedov and X. Shi, *J. Am. Chem. Soc.*, 2009, **131**, 12100–12102.
- 15 A. Martinez-Asencio, D. J. Ramon and M. Yus, *Tetrahedron*, 2011, **67**, 3140-3149.
- 16 F. Ozawa, H. Okamoto, S. Kawagishi, S. Yamamoto, T. Minami and M. Yoshifuji, *J. Am. Chem. Soc.*, 2002, **124**, 10968-10969.
- 17 B. P. Fors, D. A. Watson, M. R. Biscoe and S. L. Buchwald, *J. Am. Chem. Soc.*, 2008, **130**, 13552–13554.
- 18 C. W. Chen, M. C. Tseng, S. K. Hsiao, W. H. Chen and Y. H. Chu, *Org. Biomol. Chem.*, 2011, **9**, 4188–4193.
- 19 R. Torregrosa, I. M. Pastor and M. Yus, *Tetrahedron*, 2005, **61**, 11148–11155.
- 20 R. Akaba, H. Sakuragi and K. Tokumaru, *Bull. Chem. Soc. Jpn.*, 1985, **58**, 1186-1195.
- 21 R. Hevey and C. C. Ling, *Org. Biomol. Chem.*, 2013, **11**, 1887-1895.
- 22 J. Chen, L. Dang, Q. Li, Y. Ye, S. Fu and W. Zeng, *Synlett*, 2012, 595-600.
